# Supplementary material for: A Genome-Wide Association Study of Diabetic Kidney Disease in Subjects With Type 2 Diabetes
Source: Oxford University Press journal article supplement (doi:10.2337/db17-0914), 2018-04-27
Supplement: db170914supplementarydata2.xlsx [file db170914supplementarydata2.xlsx]

## Sheet: SuppTable1
Discovery				All diabetic kidney disease (DKD)							Chronic kidney disease (CKD)							CKD and DKD							End stage renal disease (ESRD) vs. controls							ESRD vs. no ESRD							Late DKD							Early DKD
Diabetes	Cohort	Full study name	Study reference	Cases/controls	Age of onset of diabetes [cases/controls]	Age (cases_controls)	%Males [cases/controls]	BMI (cases/controls)	HbA1c (cases/controls)	Duration of diabetes (cases/controls)	Cases/controls	Age of onset of diabetes [cases/controls]	Age (cases_controls)	%Males [cases/controls]	BMI (cases/controls)	HbA1c (cases/controls)	Duration of diabetes (cases/controls)	Cases/controls	Age of onset of diabetes [cases/controls]	Age (cases_controls)	%Males [cases/controls]	BMI (cases/controls)	HbA1c (cases/controls)	Duration of diabetes (cases/controls)	Cases/controls	Age of onset of diabetes [cases/controls]	Age (cases_controls)	%Males [cases/controls]	BMI (cases/controls)	HbA1c (cases/controls)	Duration of diabetes (cases/controls)	Cases/controls	Age of onset of diabetes [cases/controls]	Age (cases_controls)	%Males [cases/controls]	BMI (cases/controls)	HbA1c (cases/controls)	Duration of diabetes (cases/controls)	Cases/controls	Age of onset of diabetes [cases/controls]	Age (cases_controls)	%Males [cases/controls]	BMI (cases/controls)	HbA1c (cases/controls)	Duration of diabetes (cases/controls)	Cases/controls	Age of onset of diabetes [cases/controls]	Age (cases_controls)	%Males [cases/controls]
1	Eurodiab	EURODIAB Family Study (a substudy of the EURODIAB PCS)	Chaturvedi 2001	298/491	16.7(8.3)/17.9(8.1)	40.3(10.3)/42.9(10.2)	57.2/45.3	24.62(3.7)/25.05(3.42)	8.33(1.91)/7.71(1.59)	23.65(9.07)/24.95(7.7)	113/467	17,72(7,82)/17,51(8,86)	43,01(9,78)/42,31(11,33)	55,1/50,1	25,22(3,49)/24,33(3,81)	8,33(1,36)/8,43(2,35)	25,3(7,81)/24,73(9,09)	210/357	16,82(8,33)/18,26(7,78)	40,38(10,39)/43,25(9,77)	56,5/47,7	24,62(3,75)/25,24(3,38)	8,33(1,91)/8,19(1,28)	23,65(9,08)/25,01(7,82)	84/491	22,71(7,96)/17,97(8,13)	43,81(9,2)/42,91(10,27)	54,76/45,3	23,77(3,8)/25,06(3,42)	6,19(1,26)/7,71(1,59)	23,98(8,33)/24,96(7,7)	84/705	22,71(7,96)/16,96(8,13)	43,81(9,2)/44,9(10,27)	54,76/48	23,77(3,8)/26,05(3,42)	6,19(1,26)/7,75(1,59)	23,98(8,33)/25,95(7,7)	203/491	16,91(8,57)/17,97(8,13)	39,38(10,56)/42,91(10,27)	58,17/45,3	24,37(3,52)/25,06(3,42)	7,97(2,23)/7,71(1,59)	23,17(8,49)/24,96(7,7)	95/491	16,67(8,17)/17,97(8,13)	41,59(10,1)/42,91(10,27)	53,5/45,3
1	FinnDiane	Finnish Diabetic Nephropathy Study	Sandholm N et al., PloS Gen 2012; Thorn LM et al., Diabetes Care 2005	1802/1613	13.42(8.37)/15.64(8.83)	45.12(11.11)/43.56(11.66)	1067(0.59)/669(0.41)	25.69(4.12)/25.26(3.53)	71.66(16.9)/64.72(13.02)	31.7(9.9)/27.92(9.56)	2077/979	13.67(8.21)/14.66(8.68)	48.25(9.8)/43.45(11.21)	554(0.56)/995(0.48)	25.37(4.22)/25.57(3.67)	71.06(17.47)/66.54(14.03)	34.58(9.03)/28.78(9.13)	789/1422	13.28(7.92)/15.53(8.82)	47.57(9.27)/43.75(11.44)	467(0.59)/596(0.42)	25.08(4.31)/25.24(3.53)	71.43(18.32)/64.51(12.75)	34.29(8.65)/28.21(9.24)	654/1613	13.07(7.74)/15.64(8.83)	46.93(9.03)/43.56(11.66)	393(0.6)/669(0.41)	24.71(4.26)/25.26(3.53)	72.08(18.51)/64.72(13.02)	33.86(8.51)/27.92(9.56)	654/2761	13.07(7.74)/14.8(8.84)	46.93(9.03)/43.78(11.81)	393(0.6)/1343(0.49)	24.71(4.26)/25.66(3.73)	72.08(18.51)/67.51(14.67)	33.86(8.51)/28.98(10)	1339/1613	13.27(8.18)/15.64(8.83)	46.16(10.21)/43.56(11.66)	805(0.6)/669(0.41)	25.57(4.25)/25.26(3.53)	72.17(17.46)/64.72(13.02)	32.89(9.11)/27.92(9.56)	463/1613	13.86(8.9)/15.64(8.83)	42.13(12.91)/43.56(11.66)	262(0.57)/669(0.41)
1	Cambridge			197/199	9.14(4.0)/7.6 (6.0)	17 (5.7)/23.4 (10.2)	109 (54)/93 (47)	-	10.5(2.3)/8.7(1.6)	7.9 (5.4)/15.8 (6.8)																													47/199	10.4(3.9)/7.6(6.0)	18.4 (6.7)/23.4(10.2)	28 (57)/226 (50)	-	10.4 (2.7)/8.7(1.6)	8.0(6.3)/15.8 (6.8)	150/199	8.8 (4.0) /7.6 (6.0)	16.2 (5.4)/23.4 (10.2)	81 (53)/93 (47)
1	SDR	Scannia Diabetes Registry		266/292	15.9 (9.4)/17.1(9.5)	48.2 (14.5)/48.7 (13.2)	150 (56)/160 (55)	24.6(3.3)/24.4(3.2)	7.9(1.1)/7.1(0.9)	32.3(14.0)/31.5(12.3)	163/365	16.1 (9.6)/16.6(9.3)	49.2 (13.8)/48.2(12.5)	79 (48)/221 (61)	24.8(3.4)/24.4(3.2)	7.8(1.1)/7.3(1.0)	33.3(13.2)/31.8(11.4)	118/239	17.7 (9.7)/17.0 (9.4)	47.7 (12.9)/ 46.5 (12.1)	384 (55)/145 (60)	24.7(3.1)/24.4(3.2)	7.8(1.1)/7.1(0.9)	34.5(13.3)/29.5(10.7)	72/294	16.5 (9.1)/17.2 (9.4)	51.5 (13.2)/49.0 (13.4)	44 (59)/164(55)	24.4(2.9)/24.4(3.2)	7.8(1.2)/7.1(0.9)	35.0(12.4)/32.0(12.5)	75/529	16.5 (9.1)/16.7 (9.5)	51.5 (13.2)/51.8 (13.8)	44 (59)/291 (55)	24.4(2.9)/24.5(3.3)	7.8(1.2)/7.5(1.0)	35.0(12.4)/35.3(13.5)	168/292	15.4 (9.5)/17.1 (9.5)	47.9 (14.9)/48.7(13.2)	97 (58)/160 (55)	24.6(3.1)/24.4(3.2)	7.9(1.1)/7.1(0.9)	32.5(13.8)/31.5(12.3)	98/290	16.7 (9.2)/17.1 (9.5)	49.7 (14.4)/48.7(13.2)	53 (54)/160 (55)
2	SDR	Scannia Diabetes Registry		1250/580	54.5(12.6)/51.7(10.8)	65.5(11.7)/67.8(10.5)	818 (65)/303(52)	30.2(5.3)/28.9(5.1)	7.2(1.2)/6.9(1.0)	10.9(8.70/16.1(6.0)	997/666	57.6 (12.1)/48.5 (10.8)	68.5 (9.0)/64.9 (10.6)	528(52)/442(66)	29.6(5.2)/29.4(5.2)	7.2(1.2)/6.9(1.1)	12.0(8.6)/17.2(6.6)	120/587		57.0 (12.8)/48.1(10.1)	385 (63)/195(63)	29.9(5.2)/28.8(5.2)	7.2(1.2)/6.8(1.0)	13.6(9.0)/15.5(5.9)	243/580	56.9(13.1)/51.7(10.8)	68.7(10.1)/67.8(10.5)	174(59)/303(52)	29.9(5.2)/28.8(5.2)	7.2(1.2)/6.8(1.0)	12.9(8.9)/15.4(5.6)	243/1359	56.9(13.1)/51.0(11.0)	68.7(10.1)/68.7(10.11)	174(59)	29.8(5.1)/29.5(5.2)	7.1(1.3)/7.1(1.1)	13.2(8.9)/18.0(7.1)	713/580	54.8 (13.0)/51.7(10.8)	66.5(11.8)/67.8(10.5)	484(65)/303(51)	30.0(5.3)/28.9(5.1)	7.2(1.2)/6.9(1.0)	12.0(8.7)/16.1(6.0)	520/580	54.0(12.1)/51.7(10.8)	65.2(11.4)/67.8(10.5)	334(64)/303(51)
2	BENEDICT study phase A and B	Bergamo Nephrologic Diabetes Complications Trial phase A and B	• Ruggenenti P et al. N Eng J Med 2004; 351:1941-51; • Ruggenenti P et al. J. Hypertens 2011; 29: 207-2016	188/165	53.4(8.6)/49.3 (8.4)	66.3(11.0)/70.1(7.3)	146 (77)/95(58)	2938(4.8)/27.8(4.1)	6.0(1.4)/5.8(1.4)	12.(9.5)/20.8(6.0)																													66/165	52.0(8.2)/49.3(8.4)	66.7(11.8)/70.1(7.3)	58 (83)/95 (58)	29.9(4.8)/27.8(4.1)	6.1(1.4)/5.8(1.4)	19.4(10.7)/20.8(6.0)	122/162	54.2 (8.8)/49.2(8.3)	66.1 (10.7)/70.1 (7.2)	88 (72)/93(57)
2	STENO			163/131	46.1(9.2)/45.9(8.9)	61.2(7.5)/63.0(8.3)	100(60)/81(62)	29.8(5.2)/27.3(4.5)	9.1(1.7)/8.8(1.3)	15.3(7.1)/17.1(5.9)	100/174	48.3 (9.3)/44.0(8.6)	64.0 (7.2)/61.3 (8.2)	52 (52)/113(65)	29.8(4.7)/28.0(5.2)	9.2(1.7)/8.9(1.5)	15.8(7.3)/17.4(5.9)																						163/131	46.1 (9.2)/45.9 (8.9)	61.2 (7.5)/63(8.3)	100(60)/81(62)	29.8(5.2)/27.3(4.5)	9.1(1.7)/8.8(1.3)	)15.3(7.1)/17.1(5.9
2	GoDARTS 1	Genetics of Diabetes Audit Research Tayside Scotland		885/816	68.6 (9.1)/66.2(8.8)	58.9 (12.3)/54.0(12.1)	53/52	31.0(5.5)/31.0(5.4)	7.6(1.4)/7.5(1.3)	14.1(8.1)/16.5(6.8)	1025/1553	63.1 (10.1)/58.3 (10.3)	60.1 (12.2)/54.7 (12.1)	57%/41%	31.2 (5.7)/31.0 (5.7)	7.6 (1.5)/ 7.5 (1.4)	15.7 (8.5)/15.0 (7.1)	168/716	63.9 (11.4)/59.3(10.4)	60.1 (14.4)/56.1 (12.1)	59%/45%	30.5 (5.3)/31.1 (5.7)	7.5 (1.5)/7.5(1.4)	15.6 (10.7)/15.2(7.1)	80/816	72.6(9.8)/66.2(8.8)	57.5(14.5)/54.0(12.1)	44/52	30.2(5.0)/31.0(5.4)	7.7(2.0)/7.5(1.3)	13.4(12.2)/16.5(6.8)	48/1491	72.6(9.8)/	57.5(14.5)/	44	30.2(5.0)/	7.7(2.0)/	13.4(12.2)/	218/816	69.9(9.1)/66.2(8.8)	57.6(13.8)/54.0(12.1)	61/52	30.4(4.8)/31.0(5.4)	7.8(1.6)/7.5(1.3)	14.9(9.8)/16.5(6.8)	667/816	68.2(9.1)/66.2(8.8)	59.3(11.8)/54.0(12.1)	51/52
2	GoDARTS2	Genetics of Diabetes Audit Research Tayside Scotland		859/680	67.9(11.6)/66.2(10.8)	72.1(11.2)/70.1(10.7)	60/60	31.5(6.1)/31.2(6.1)	7.5(1.5)/7.5(1.3)	11.4(6.9)/15.5(5.5)	972/513	64.9 (12.0)/57.4 (12.2)	77.4 (8.4)/69.5 (11.0)	52%/39%	30.8 (6.0)/31.6(6.3)	7.4 (1.5)/7.4 (1.4)	13.9 (7.3)/12.9 (6.3)	120/587	65.2 (12.4)/57.4 (12.2)	78.4 (7.9)/69.5 (11.0)	50%/39%	31.2 (6.2)/31.6(6.3)	7.6 (1.7)/7.4 (1.4)	12.4 (7.6)/12.9 (6.3)	48/680	71.9(10.0)/66.2(10.8)	72.0(4.1)/70.8(10.7)	52/60	31.7(7.5)/31.2(6.1)	7.9(2.0)/7.5(1.3)	7.8(6.6)/15.5(5.5)	80/1621	71.9(10.0)/	72.0(4.1)/	52/	31.7(7.5)/	7.9(2.0)/	7.8(6.6)/	179/680	69.8(11.1)/66.2(10.8)	73.1(9.8)/70.8(10.7)	67/60	31.7(6.2)/31.2(6.1)	7.9(1.7)/7.5(1.3)	12.0(7.5)/15.5(5.5)	680/680	67.4(11.6)/66.2(10.8)	71.8(11.5)/70.8(10.7)	57/60
Replication
2	FIND GWAS/4D/LURIC/Joslin		See above and below	655/1433	42.84 ± 13.63 / 48.90 ± 14.41	62.32 ± 9.94 / 63.44 ± 9.47	391 (59.5%) / 865 (59.1%)	28.57 ± 5.67 / 28.92 ± 4.84	7.06 ± 1.58 / 7.35 ± 1.61	20.42 ± 9.30 / 14.96 ± 10.65																													655/1433	42.84 ± 13.63 / 48.90 ± 14.41	62.32 ± 9.94 / 63.44 ± 9.47	391 (59.5%) / 865 (59.1%)	28.57 ± 5.67 / 28.92 ± 4.84	7.06 ± 1.58 / 7.35 ± 1.61	20.42 ± 9.30 / 14.96 ± 10.65
2	FIND GWAS / 1000 Genomes	Family Investigation of Nephropathy and Diabetes	Knowler WC et al. (2005), J Diabetes Complications 19, 1-9	362/435	42.06 ± 13.97 / 42.31 ± 12.14	63.86 ± 11.25 / 61.85 ± 9.38	186 (51.4%) / 184 (42.2%)	29.06 ± 6.85 / 32.02 ± 6.35	7.07 ± 1.73 / 7.57 ± 1.62	21.92 ± 8.85 / 19.03 ± 8.99																													362/435	42.06 ± 13.97 / 42.31 ± 12.14	63.86 ± 11.25 / 61.85 ± 9.38	186 (51.4%) / 184 (42.2%)	29.06 ± 6.85 / 32.02 ± 6.35	7.07 ± 1.73 / 7.57 ± 1.62	21.92 ± 8.85 / 19.03 ± 8.99
2	4D discovery	Die Deutsche Diabetes Dialyse Studie (The German Diabetes Dialysis Study)	Wanner C et al. (2005), N Engl J Med 353, 238-248	See above
2	LURIC discovery	Ludwigshafen Risk and Cardiovascular Health Study	Winkelmann BR et al. (2001), Pharmacogenomics 2, S1-S73	See above
2	Joslin	Joslin Kidney Study on the Genetics of Diabetic Nephropathy	Wanic K et al. (2008), Diabetes 57, 2547-2551	See above
2	DeCode										2885/471																					551/432
2	DIREVA	Diabetes register Vasa		253/861	57.5(11.0)/55.4(10.1)	67.9(10.4)/71.8(9.5)	71.1/49.7	31.8(5.8)/30.3(5.2)	53.2(15.9)/51.6(11.6)	10.4(7.9)/16.4(5.5)	223/1954	62.9(10.2)/56.9(10.9)	70.8(8.6)/66.5(10.7)	48.6/60.8	31.0(5.3)/30.7(5.4)	51.6(13.9)/50.2(15.0)	8.4(7.6)/9.7(6.7)	54/537	59.6(10.8)/52.7(9.4)	69.8(8.1)/69.0(8.7)	69.8/57.8	31.3(5.1)/30.3(5.2)	50.7(12.6)/52.7(13.0)	10.2(8.8)/16.4(5.4)	17/770	56.1(11.8)/53.1(9.6)	69.4(9.4)/69.7(9.0)	58.8/61.8	30.9(4.9)/30.4(5.3)	48.0(12.6)/53.2(13.4)	13.4(11.6)/16.6(5.6)	17/1156	56.1(11.8)	69.4(9.4)/71.6(9.2)	58.8/55.8	30.9(4.9)/30.5(5.3)	48.0(12.6)/53.0(12.6)	13.4(11.6)/16.7(5.8)	57/861	55.2(11.0)/55.2(10.1)	67.0(10.4)/71.9(9.3)	68.3/50.2	32.3(5.9)/30.3(5.2)	56.2(19.9)/52.2(11.9)	11.8(9.6)/16.7(5.7)	200/864	58.0(10.7)/55.2(10.1)	65.8(11.4)/71.9(9.3)	73.1/50.2
2	Dolce	Diagnostic Optimization and Treatment of diabetes and its complications in the Chernihiv region									229/1301	48.7(9.0)/50.7(9.22)	59.7(6.3)/56.9 (8.6)	17.5/33.7
2	Riken	RIKEN1N07		4109/5234	54.0(12.6)/52.6(11.2)	65.4(10.7)/66.4(9.6)	0.65/0.60	24.3(4.1)/23.6(3.6)	-	11.1(9.4)/9.7(8.6)																													2380/5234	53.9(13.0)/52.6(11.2)	65.7(10.6)/66.4(9.6)	0.66/0.60	24.2(4.1)/23.6(3.6)	NA	11.4(9.7)/9.7(8.6)
2	Riken	RIKEN2Univ08		704/2903	54.6(12.1)/56.9(11.1)	66.6(9.9)/65.4(10.0)	0.68/0.67	23.8(4.0)/24.2(3.8)	-	12.1(9.7)/8.7(7.9)																													429/358	54.1(12.0)/54.2(10.8)	66.5(10.2)/67.0(9.3)	0.70/0.62	23.6(4.0)/23.6(3.8)	NA	12.6(9.8)/12.9(10.1)
2	SDCS-1	Singapore Diabetic Cohort 1 (PMID: 21490949)									148/245	59.51(13.85)/46.10(9.86)	71.07(9.29)/65.40(8.58)	54(0.36)/92(0.38)	25.11(3.85)/24.17(3.91)	-	11.56(10.59)/19.30(6.64)
2	SDCS-2	Singapore Diabetic Cohort 2 (PMID: 21490949)									125/229	53.13(15.38)/44.07(10.43)	67.58(9.93)/64.58(9.38)	81(0.65)/154(0.67)	25.89(3.67)/24.66(3.42)	-	14.46(11.92)/20.51(7.31)
2	SMART2D	Singapore Study of Macro-angiopathy and Micro-vascular Reactivity in Type 2 Diabetes (SMART2D)	Singapore Study of Macro-angiopathy and Micro-vascular Reactivity in Type 2 Diabetes (SMART2D)	465/154 (Chinese)	44.57(12.31)/42.25(9.58)	59.76(11.36)/62.06(9.99)	61.72/44.16	27.35(4.89)/24.81(3.90)	7.93(1.29)/7.70(1.14)	15.14(10.35)/19.64(7.70)	207/273	46.3(12.14)/39.93(10.1)	64(9.6)/60(10)	136(0.657)/139(0.509)	26.82(4.86)/25.80(4.49)	7.80(1.30)/7.96(1.21)	17.80(10.36)/20.46(7.8)	75/119	43.79(12.05)/41.52(10.16)	63.51(9.06)/60.76(10.18)	54(0.72)/54(0.454)	27.15(4.12)/24.39(3.73)	8.10(1.44)/7.74(1.14)	19.72(10.44)/19.23(7.72)	20/149	40.63(12.43)/42.40(10.18)	58.16(10.05)/62.13(10.12)	14(0.684)/67(0.450)	27.43(5.05)/24.78(3.91)	7.67(1.39)/7.70(1.15)	17.53(10.0)/19.73(7.77)	20/398	40.63(12.43)/40.67(10.31)	58.16(10.05)/62.04(10.1)	14(0.684)/223(0.56)	27.43(5.05)/26.04(4.44)	7.67(1.39)/7.96(1.23)	17.53(10.0)/21.38(8.03)	178/154	42.74(11.84)/42.42(10.05)	59.94(9.91)/62.06(9.99)	128(0.719)/68(0.442)	27.37(4.14)/24.81(3.9)	8.13(1.37)/7.70(1.14)	17.20(10.42)/19.64(7.69)	286/154	45.77(12.57)/42.42(10.08)	59.63(12.21)/62.06(9.99)	159(0.556)/68(0.442)
				156/66 (Indian)	43.22(11.03)/39.41(9.86)	56.69(9.95)/59.36(8.07)	58.97/43.94	29.16(5.57)/27.86(5.12)	8.29(1.39)/7.88(1.08)	13.47(9.52)/19.95(6.46)	58/107	47.06(12.68)/38.00(10.15)	62.93(9.37)/58.31(7.64)	30(0.517)/55(0.514)	28.74(4.46)/27.85(2.13)	7.83(1.47)/8.31(1.23)	15.87(10.14)/20.30(6.71)	NA							NA							NA							39/64	43.95(11.67)/39.34(10.01)	58.64(8.70)/59.39(8.14)	23(0.590)/27(0.422)	29.39(6.34)/27.95(5.17)	8.31(1.53)/7.89(1.09)	14.69(8.38)/20.05(6.48)	114/66	42.91(10.93)/39.41(9.86)	55.94(10.40)/59.36(8.07)	68(0.596)/29(0.439)
				202/21 (Malay)	45.21(11.13)/40.38(8.78)	56.59(9.56)/55.86(8.44)	49.51/57.14	30.09(5.76)/30.79(5.04)	8.20(1.54)/8.49(1.65)	11.37(8.11)/15.48(3.08)	103/56	46.92(11.53)/37.57(8.45)	59.25(9.71)/55.96(8.28)	52(0.505)/32(0.571)	29.51(5.39)/29.97(6.23)	8.08(1.51)/8.37(1.49)	12.35(7.57)/18.39(5.60)	NA							NA							NA							NA							116/21	46.14(11.63)/40.38(8.78)	56.28(10.18)/55.86(8.44)	47(0.405)/12(0.571)
2	HKDR	Hong Kong Diabetes Registry		2459/638	51.8 ± 12.7 / 44.4 ± 10.7	60.6 ± 12.8 / 60.1 ± 10.6	1187 (48.3%) / 219 (34.3%)	25.5 ± 4.1 / 24 ± 3.5	8 ± 1.9 / 7.8 ± 1.5	8.9 ± 7.4 / 15.8 ± 4.7	2691 / 2849	54.1 ± 12.1 / 45.8 ± 11.3	63.3 ± 11.3 / 51.9 ± 12	1232 (45.8%) / 1258 (44.2%)	25.2 ± 3.8 / 25.1 ± 4.1	7.9 ± 1.9 / 7.4 ± 1.6	9.2 ± 7.4 / 6.1 ± 5.9	268 / 632	55.6 ± 11.5 / 44.3 ± 10.7	67.3 ± 10.6 / 60 ± 10.6	115 (42.9%) / 218 (34.5%)	25 ± 3.9 / 24 ± 3.5	7.6 ± 1.7 / 7.8 ± 1.5	11.7 ± 8.1 / 15.8 ± 4.6	877 / 4861	52.3 ± 12.8 / 49.7 ± 12.4	62.7 ± 12 / 56.6 ± 12.9	413 (47.1%) / 2198 (45.2%)	25.3 ± 3.9 / 25.1 ± 4	8.1 ± 2.1 / 7.6 ± 1.7	10.4 ± 7.5 / 6.9 ± 6.5	877 / 4510	52.3 ± 12.8 / 48.8 ± 12	62.7 ± 12 / 56.1 ± 12.8	413 (47.1%) / 1988 (44.1%)	25.3 ± 3.9 / 25.1 ± 4	8.1 ± 2.1 / 7.6 ± 1.7	10.4 ± 7.5 / 7.3 ± 6.6	946 / 4568	51.9 ± 12.8 / 49.7 ± 12.4	62.4 ± 12.5 / 56.5 ± 12.8	477 (50.4%) / 2046 (44.8%)	25.5 ± 4.2 / 25.1 ± 3.9	8 ± 1.9 / 7.6 ± 1.7	10.4 ± 7.9 / 6.7 ± 6.4	1518 / 3990	51.7 ± 12.6 / 49.5 ± 12.4	59.5 ± 13 / 56.7 ± 12.9	713 (47%) / 1808 (45.3%)
2	MDC	Malmo Diet and Cancer Study	Manjer J, Carlsson S, Elmstahl S, Gullberg B, Janzon L, Lindstrom M, Mattisson I, Berglund G: The Malmo Diet and Cancer Study: representativity, cancer incidence and mortality in participants and non-participants. Eur J Cancer Prev 2001, 10:489-499.
2	Inter99	Inter99	Ahluwalia TS et al. J Clin Endocrinol Metab. 2015 (PMID: 25599387)
2	Vejle Biobank	Vejle Biobank	Ahluwalia TS et al. J Clin Endocrinol Metab. 2015 (PMID: 25599387)
2	ADDITION	Anglo-Danish-Dutch study of Intensive Treatment In PeOple with screeN detected diabetes in primary care	Ahluwalia TS et al. J Clin Endocrinol Metab. 2015 (PMID: 25599387)
1	DIREVA	Diabetes register Vasa		54/326	22.0(17.7)/19.9(14.5)	50.5(14.7)/50.9(15.7)	61.4/50.0	27.6(5.4)/26.1(4.1)	74.4(19.0)/65.3(13.7)	28.6(14.4)/31.0(11.4)	33/469	22.7(19.4)/18.7(12.8)	45.2(15.0)/52.2(14.0)	61.8/55.1	26.6(4.8)/25.7(4.0)	68.1(17.5)/68.7(19.6)	29.5(11.8)/26.5(13.9)	18/282	14.9(12.3)/16.11(10.6)	45.5(9.9)/47.6(13.6)	66.7/50.0	27.7(4.6)/25.7(3.6)	67.3(15.7)/64.5(13.0)	30.6(10.8)/31.5(11.4)	14/353	13.0(8.2)/16.6(11.5)	50.9(9.6)/48.2(14.1)	61.5/51.1	27.8(5.1)/25.9(3.9)	67.6(14.9)/66.4(15.2)	37.9(11.8)/31.5(11.5)	14/411	54.9(9.9)	50.9(9.6)/49.4(14.9)	61.5/50.9	27.8(5.1)/26.1(4.2)	67.6(14.9)/67.0(15.8)	37.9(11.9)/31.6(11.7)	25/326	15.7(14.1)/17.1(12.0)	48.4(12.5)/48.9(14.7)	66.7/49.3	27.6(4.6)/25.9(4.0)	70.7(22.6)/65.3(14.1)	32.7(12.0)/31.8(11.7)	30/330	20.1(15.5)/17.1(11.9)	44.1(16.7)/48.8(14.7)	51.9/49.1
1	UK-ROI	All Ireland Warren 3 Genetics of Kidneys in Diabetes UK Collection [UK-ROI]	Syreeni A et al. (2011) Genetic examination of SETD7 and SUV39H1/H2 methyltransferases and the risk of diabetes complications in patients with type 1 diabetes. Diabetes 60: 3073–3080.	823/903	14.50(7.67)/14.52(7.85)	47.44(10.65)/41.52(11.04)	478(0.58)/395(0.44)	26.32(4.74)/26.23(4.15)	9.02(1.86)/8.73(1.61)	23.94(9.57)/27.00(8.63)	668/606	15.06(7.62)/13.64(7.90)	48.10(10.79)/40.53(10.68)	320(0.47)/335(0.55)	26.24(4.71)/26.21(1.62)	8.61(1.71)/8.75(1.62)	33.04(9.63)/26.89(8.26)	316/523	14.63(7.36)/13.36(7.84)	48.46(9.68)/39.48(10.45)	175(0.55)/272(0.52)	25.43(4.76)/26.21(4.07)	8.82(1.91)/8.73(1.64)	33.83(8.54)/26.12(7.86)	246/903	14.3(7.25)/14.52(7.85)	48.74(9.62)/41.52(11.04)	138(0.56)/395(.044)	25.14(4.72)/26.23(4.15)	8.66(1.99)/8.73(1.61)	34.41(8.00)/27.00(8.63)	246/1441	14.33(7.25)/14.65(7.85)	48.74(9.62)/43.67(11.42)	138(0.56)/718(0.50)	25.14(4.72)/26.47(4.34)	8.66(1.99)/8.88(1.69)	34.41(8.00)/29.02(9.60)	538/903	14.87(7.86)/14.52(7.85)	47.28(11.14)/41.52(11.04)	323(0.60)/395(0.44)	26.90(4.64)/26.23(4.15)	9.16(1.80)/8.73(1.61)	32.40(10.19)/27.00(8.63)
1	GoKinD US	Genetics of Kidneys in Diabetes US Study [GoKinD US]	Pezzolesi MG et al. (2009) Genome-wide association scan for diabetic nephropathy susceptibility genes in type 1 diabetes. Diabetes 58: 1403–1410. doi: 10.2337/db08-1514	773/821	11.84(6.64)/13.02(7.30)	43.18(6.93)/38.46(8.56)	401(0.52)/342(0.42)	25.12(6.93)/25.50(6.23)	7.17(3.03)/7.37(1.73)	31.35(7.77)/25.45(7.73)	710/876	11.95((6.61)/12.77(7.26)	43.67(6.83)/38.48(8.36)	346(0.49)/397(0.45)	24.96(6.99)/25.58(6.14)	6.96(3.19)/7.51(1.56)	31.73(7.58)/25.71(7.74)	635/784	11.82(6.49)/13.05(7.33)	44.13(6.40)/38.54(8.51)	320(0.50)/336(0.43)	24.68(7.12)/25.43(6.27)	6.92(3.05)/7.40(1.54)	32.31(7.25)/25.50(7.74)	508/821	11.70(6.31)/13.02(7.28)	44.54(6.08)/38.46(8.56)	256(0.50)/342(0.42)	24.48(7.09)/25.05(6.23)	6.62(3.08)/7.37(1.73)	32.84(7.12)/25.45(7.73)	508/1086	11.70(6.31)/12.79(7.28)	44.54(6.08)/38.98(8.40)	256(0.50)/487(0.45)	24.78(7.09)/25.71(6.23)	6.662(3.08)/7.58(2.01)	32.84(7.12)/26.19(7.95)	265/821	12.09(7.24)/13.02(7.28)	40.58(7.70)/38.46(8.56)	145(0.55)/342(0.42)	26.35(6.22)/25.50(6.23)	8.22(2.62)/7.37(1.73)	28.49(8.17)/25.45(7.73)
1	French Danish Effort	French and Danish effort to dissect the genetics of diabetic nephropathy	Gemain et al Diabetologia (2015) 58:543–548	691/739	13.56 (9.09) / 16.22 (9.18)	41.6 (10.80) / 44.87 (11.44)	422 (0.61) / 381 (0.52)	-	8.8 (1.8) / 8.4 (1.4)	28.07 (8.83) / 28.65 (9.57)	381/1030	14.48 (9.65) / 15.03 (9.07)	44.71 (11.77) / 43.03 (10.98)	188 (0.49) / 601 (0.58)	not simply available	8.7 (1.7) / 8.5 (1.5)	30.23 (9.33) / 27.99 (8.92)	162 / 674	13.83 (10.26) / 15.91 (9.12)	43.01 (11.48) / 44.12 (11.06)	94 (0.58) / 363 (0.54)	not simply available	8.9 (1.9) / 8.4 (1.4)	29.17 (8.97) / 28.22 (9.27)	72 / 739	10.58 (6.61) / 16.22 (9.18)	40.26 (7.17) / 44.87 (11.44)	42 (0.58) / 381 (0.52)	-	8.3 (1.4)/ 8.4 (1.4)	29.68 (7.09) / 28.65 (9.57)	72 / 1343	10.58 (6.61) / 15.05 (9.26)	40.26 (7.17) / 43.70 (11.31)	42 (0.58) / 754 (0.56)		8.3 (1.4) / 8.6 (1.5)	29.68 (7.09) / 28.65 (9.08)	499 / 739	13.30 (8.83) / 16.22 (9.18)	40.49 (10.38) / 44.87 (11.44)	320 (0.64) / 381 (0.52)	not simply available	-	27.19 (8.47) / 28.65 (9.57)	192 / 739	14.23 (9.74) / 16.22 (9.18)	44.59 (11.33) / 44.87 (11.44)	102 (0.53) / 381 (0.52)
1	DCCT/EDIC	Diabetes Control and Complications Trial/Epidemiology of Diabetes Interventions and Complications	N Engl J Med. 1993 Sep 30;329(14):977-86.	551/720	20.2(8.4)/21.9 (7.8)	48.2(7.9)/49.2(7.1)	303(55)/373(52)	29.2(13.6)/28.2(5.2)	8.2(1.4)/7.8(1.1)	28.1(5.4)/27.3(5.2)	79/1187	22.1(8.6)/21.1(8.1)	49.2(8.5)/48.9(7.3)	40(51)/632(53)	27.9(5.7)/28.7(10.0)	8.2(1.6)/8.0(1.3)	27.1(5.4)/27.8(5.1)																						141/720	19.6(8.1)/21.9(7.8)	47.4(7.7)/49.2(7.1)	102(72)/373 (52)	28.5(5.3)/28.2(5.2)	8.4(1.6)/7.8(1.1)	27.7(5.3)/27.3(5.2)	410/720	20.3(8.5)/21.9(7.8)	48.5(8.0)/49.2(7.1)	201(49)/373(52)
1	Joslin			349/724	15.3(9.5)/17.1(10.4)	39.6(10.9)/43.3(13.0)	203(58.2)/345(47.7)	-	9.3(1.8)/8.3(1.3)	24.3(9.3)/26.2(10.3)	198/850	16.4(9.9)/16.7(10.3)	43.7(12.1)/41.8(12.6)	99(50.0)/435(41.5)	-	9.1(1.9)/8.4(1.4)	27.3(10.0)/25.1(9.9)	153/674	15.5(9.5)/17.1(10.5)	41.1(10.8)/42.9(12.9)	81(52.9)/324(48.1)	-	9.6(2.0)/8.3(1.3)	25.6(9.3)/25.7(10.1)	138/724	15.1(9.3)/17.1(10.4)	40.1(9.8)/43.3(13.0)	71(51.5)/345(47.7)	-	9.7(1.9)/8.3(1.3)	25.0(8.6)/26.1(10.3)	138/935	15.1(9.3)/16.7(10.3)	40.1(9.8)/42.4(12.8)	71(51.5)/477(51.0)		9.7(1.9)/8.4(1.4)	25.0(8.6)/25.7(10.2)	349/724	15.3(9.5)/17.1(10.4)	39.6(10.9)/43.3(13.0)	203(58.2)/345(47.7)	-	9.3(1.8)/8.3(1.3)	24.3(9.3)/26.2(10.3)
1	FinnDiane replication	Finnish Diabetic Nephropathy Study	Thorn LM et al., Diabetes Care 2005	68/815	14.82 (7.97)/16.21 (9.69)	48.99 (9.78)/42.77 (12.06)	46 (0.68)/423 (0.52)	25.49 (5.31)/25.69 (3.99)	8.59 (1.29)/8.39 (1.19)	34.17 (9.45)/26.56 (11.29)								70/366	13.91 (7.88)/15.48 (9.56)	47.23 (10.61)/42.08 (11.81)	48 (0.69)/179 (0.49)	24.81 (4.58)/25.37 (3.55)	67.84 (22.37)/59.64 (22.88)	33.35 (10.75)/26.46 (9.9)	94/1001	14.59 (8.26)/15.72 (9.46)	49.27 (9.38)/43.94 (12.07)	60 (0.64)/501 (0.5)	25.16 (4.92)/25.76 (4.04)	8.65 (1.44)/8.34 (1.2)	34.67 (9.33)/28.22 (11.53)	94/999	14.59 (8.26)/15.72 (9.46)	49.27 (9.38)/43.92 (12.07)	60 (0.64)/499 (0.5)	25.16 (4.92)/25.76 (4.04)	8.65 (1.44)/8.34 (1.2)	34.67 (9.33)/28.21 (11.54)
[truncated: 11 more columns]
