# Supplementary material for: A Genome-Wide Association Study of Diabetic Kidney Disease in Subjects With Type 2 Diabetes
Source: Oxford University Press journal article supplement (doi:10.2337/db17-0914), 2018-04-27
Supplement: db170914supplementarydata3.xlsx [file db170914supplementarydata3.xlsx]

## Sheet: SuppTable4
Discovery			Genotyping characteristics
Diabetes	Cohort	Full study name	Genotyping centre	Genotyping array	Calling algorithm	Pre-Imputation QC - Exclusion criteria	Sample call rate	SNP call rate	HWE	Imputation software	Reference panel	Analysis software	Analysis model	Total SNPs included in analysis [genotyped/imputed]
1	Eurodiab	EURODIAB Family Study (a substudy of the EURODIAB PCS)	Lund University	Illumina Omni-express	GenomeStudio	SNP call rate <95%, MAF<1%, HWE p<10-6, evidence of plate differences (p<1e-7). Sample call rate <95%, extremely high/low heterozygosity (>3 sd. from mean), Admixture (PC1 or PC2 > 6 sd. away from mean + visual evaluation),	0.99	0.99	1e-06	IMPUTEv2	1000G P1	SNPtest, EMMAX	SNPtest: --score --frequentist
1	FinnDiane	Finnish Diabetic Nephropathy Study	FIMM	Human 610Quad	GenomeStudio	SNP call rate <95%, MAF<1%, HWE p<10-7, missingness by haplotype (p<10-8), missingness by phenotype (p<1e-8), evidence of plate differences (p<1e-7). Sample call rate <95%, extremely high/low heterozygosity (>4 sd. from mean), first degree relatives, Admixture (PC1 or PC2 > 6 sd. away from mean + visual evaluation),	0.998	0.999		IMPUTEv2	1000Genomes (Mar 2012)	SNPtest, EMMAX	SNPtest: --score --frequentist	549,530/9,343,778
1	Cambridge		Lund University	Illumina Omni-express	GenomeStudio	SNP call rate <95%, MAF<1%, HWE p<10-6, evidence of plate differences (p<1e-7). Sample call rate <95%, extremely high/low heterozygosity (>3 sd. from mean), Admixture (PC1 or PC2 > 6 sd. away from mean + visual evaluation),	0.99	0.99	1e-06	IMPUTEv2	1000G P1	SNPtest, EMMAX	SNPtest: --score --frequentist	663,596/7,834,110
1	SDR	Scannia Diabetes Registry	Lund University	Illumina Omni-express	GenomeStudio	SNP call rate <95%, MAF<1%, HWE p<10-6, evidence of plate differences (p<1e-7). Sample call rate <95%, extremely high/low heterozygosity (>3 sd. from mean), Admixture (PC1 or PC2 > 6 sd. away from mean + visual evaluation),	0.99	0.99	1e-06	IMPUTEv2	1000G P1	SNPtest, EMMAX	SNPtest: --score --frequentist	664,643/7,198,714
2	SDR	Scannia Diabetes Registry	Lund University	Illumina Omni-express	GenomeStudio	SNP call rate <95%, MAF<1%, HWE p<10-6, evidence of plate differences (p<1e-7). Sample call rate <95%, extremely high/low heterozygosity (>3 sd. from mean), Admixture (PC1 or PC2 > 6 sd. away from mean + visual evaluation),	0.99	0.99	1e-06	IMPUTEv2	1000G P1	SNPtest, EMMAX	SNPtest: --score --frequentist	682,605/8,482,854
2	BENEDICT study phase A and B	Bergamo Nephrologic Diabetes Complications Trial phase A and B	Lund University	Illumina Omni-express	GenomeStudio	SNP call rate <95%, MAF<1%, HWE p<10-6, evidence of plate differences (p<1e-7). Sample call rate <95%, extremely high/low heterozygosity (>3 sd. from mean), Admixture (PC1 or PC2 > 6 sd. away from mean + visual evaluation),	0.99	0.99	1e-06	IMPUTEv2	1000G P1	SNPtest, EMMAX	SNPtest: --score --frequentist	650,965/6,558,257
2	STENO		Lund University	Illumina Omni-express	GenomeStudio	SNP call rate <95%, MAF<1%, HWE p<10-6, evidence of plate differences (p<1e-7). Sample call rate <95%, extremely high/low heterozygosity (>3 sd. from mean), Admixture (PC1 or PC2 > 6 sd. away from mean + visual evaluation),	0.99	0.99	1e-06	IMPUTEv2	1000G P1	SNPtest, EMMAX	SNPtest: --score --frequentist	649,337/6,191,454
2	GoDARTS 1	Genetics of Diabetes Audit Research Tayside Scotland	Oxford University	Affymetrix 6.0 SNP genotyping array	CHIAMO	SNP call rate <95%, MAF<1%, HWE p<10-6, evidence of plate differences (p<1e-7). Sample call rate <95%, extremely high/low heterozygosity (>3 sd. from mean), Admixture (PC1 or PC2 > 6 sd. away from mean + visual evaluation),	0.99	0.99		IMPUTEv2	1000G P1	SNPtest, EMMAX	SNPtest: --score --frequentist
2	GoDARTS2	Genetics of Diabetes Audit Research Tayside Scotland	Lund University	Illumina Omniexpress	GenomeStudio	SNP call rate <95%, MAF<1%, HWE p<10-6, evidence of plate differences (p<1e-7). Sample call rate <95%, extremely high/low heterozygosity (>3 sd. from mean), Admixture (PC1 or PC2 > 6 sd. away from mean + visual evaluation),	0.99	0.99		IMPUTEv2	1000G P1	SNPtest, EMMAX	SNPtest: --score --frequentist
Replication
2	FIND GWAS/1000 Genomes	Family Investigation of Nephropathy and Diabetes	Affymetrix Commercial Service/Translational Genomics Research Institute	Affymetrix 6.0	Birdseed v. 2/Affymetrix Genotyping Console	SNP call rate < 98%, MAF < 1%, dHWE p < 1e-06. Samples: Affymetrix QC call rate < 95%, extremely high heterozygosity, discordant with previous genotyping, ethnic admixture (non-European admixture > 20%)	0.99	0.99	1e-06	IMPUTE2	1000 Genomes, Phase 1 v. 3 (March 2012)	PLINK	Logistic regression, additive model (on the log OR scale)	9073285
2	FIND GWAS discovery/HapMap II	Family Investigation of Nephropathy and Diabetes	Affymetrix Commercial Service/Translational Genomics Research Institute	Affymetrix 6.0	Birdseed v. 2/Affymetrix Genotyping Console	SNP call rate < 98%, MAF < 1%, dHWE p < 1e-06. Samples: Affymetrix QC call rate < 95%, extremely high heterozygosity, discordant with previous genotyping, ethnic admixture (non-European admixture > 20%)	0.99	0.99	1e-06	MaCH	HapMap II	PLINK	Logistic regression, additive model (on the log OR scale)	2379073
2	4D discovery	Die Deutsche Diabetes Dialyse Studie (The German Diabetes Dialysis Study)	Unknown	Unknown	Unknown	SNP call rate < 95%, MAF < 1%, dHWE p < 1e-06. Samples: Call rate < 90%, ethnic admixture (visual inspection)	0.98	0.99	1e-06	MaCH	HapMap II	PLINK	Logistic regression, additive model (on the log OR scale)	2379073
2	LURIC discovery	Ludwigshafen Risk and Cardiovascular Health Study	LURIC Study nonprofit LLC, Heidelberg	Affymetrix 6.0	Birdseed v. 2	SNP call rate < 98%, MAF < 1%, dHWE p < 1e-04. Sample call rate < 95%, ethnic admixture (visual inspection)	0.99	0.99	0.0001	MaCH	HapMap II	PLINK	Logistic regression, additive model (on the log OR scale)	2543887
2	Joslin	Joslin Kidney Study on the Genetics of Diabetic Nephropathy	Unknown	Illumina CNV370	Unknown	SNP call rate < 95%, MAF < 1%, dHWE p < 1e-06. Samples: Affymetrix QC call rate < 95%, ethnic admixture (visual inspection)	0.99	0.99	1e-06	MaCH	HapMap II	PLINK	Logistic regression, additive model (on the log OR scale)	2424422
2	DeCode
2	DIREVA	Diabetes register Vasa	Lund University	Sequenome iPlex	Unknown	SNP call rate < 90%, MAF < 1%, dHWE p < 0.05. Samples: Call rate < 90%	0.98	0.92	0.05	NA	NA	PLINK	Logistic/linear regression, additive model (on the log OR scale)	9
2	Dolce	Diagnostic Optimization and Treatment of diabetes and its complications in the Chernihiv region	Lund University	Sequenome iPlex	Unknown	SNP call rate < 90%, MAF < 1%, dHWE p < 0.05. Samples: Call rate < 90%	0.98	0.92	0.05	NA	NA	PLINK	Logistic/linear regression, additive model (on the log OR scale)	11
2	Riken	BioBank Japan 3	RIKEN	Human Omni Express Exome	GenCall software (GenomeStudio)	SNP call rate <99%, MAF<1%, HWE p<10-6, Admixture (Japanese Hondo cluster defined by PCA)	≥98%	≥99%	1e-06	MACH, minimac	1000Genomes P1 (Mar 2012, JPT+CHS+CHB) n=275	mach2dat	Logistic regression, additive model	625,941-629,682/6,000,198 (RSQ≥0.7)
		BioBank Japan 2	RIKEN	Illumina Human 610K SNP array	GenCall software (GenomeStudio)	SNP call rate <99%, MAF<1%, HWE p<10-6, Admixture (Japanese Hondo cluster defined by PCA)	≥98%	≥99%	1e-06	MACH, minimac	1000Genomes P1 (Mar 2012, JPT+CHS+CHB) n=275	mach2dat	Logistic regression, additive model	499,569-507,507/5,893,968 (RSQ≥0.7)
2	SDCS-1	Singapore Diabetic Cohort 1	Genome Institute of Singapore	Illumina Human 610K SNP array	GenomeStudio	SNP call rate <95%, HWE p<10-6, excess heterozygosity, discordant ethnic membership, gender discrepancies, first degree cryptic relatedness	0.95	0.95	1e-06	MACH	1000G Phase 1 mixed panel	EPACTS	EMMAX for eGFR, Firth for CKD	46 SNPs for eGFR / 172 SNPs for CKD
2	SDCS-2	Singapore Diabetic Cohort 2	Genome Institute of Singapore	Illumina Human 1Mv3 SNP array	GenomeStudio	SNP call rate <95%, HWE p<10-6, excess heterozygosity, discordant ethnic membership, gender discrepancies, first degree cryptic relatedness	0.95	0.95	1e-06	MACH	1000G Phase 1 mixed panel	EPACTS	EMMAX for eGFR, Firth for CKD	46 SNPs for eGFR / 172 SNPs for CKD
2	HKDR	Hong Kong Diabetes Registry	Illumina Inc.	Illumina Omni 2.5+ exome array	GenomeStudio	SNP: MAF <5% & call rate <99%; MAF >=5% & call rate <95%; MAF <1%; HWE <1E-04; evidence of plate differences (p<1e-5). Samples: call rate <97%, extremely high heterozygosity, discordant with previous genotyping, ethnic admixture (visual inspection), first and second degree relatives.	0.97	99% for MAF <5%; 95% for MAF >=5%	0.0001	minimac 3	1000G Phase 3 v5	epacts	epacts --test q.lm ( Linear Wald Test for Quantitive Traits) epacts --test b.firth (Firth Bias-Corrected Logistic Likelihood Ratio Test for Binary Outcomes)	1,257,031/8,028,021
2	SMART2D	Singapore Study of Macro-angiopathy and Micro-vascular Reactivity in Type 2 Diabetes (SMART2D)	Genome Institute of Singapore	Illumina Omni Express	GenomeStudio	SNP: MAF <1%, call rate <95%; HWE <1E-06; Samples: call rate <95%, extremely high heterozygosity, gender discordant samples,first and second degree relatives, PCA outliers(visually)	0.95	0.95	1e-06	Impute2	1000G Phase3	SNPTEST	Logistic regression, additive model	7271546snps&indels for Chinese; 7653512snps&indels for Indian;7667583snps&indels for Malay with impute info>0.8 and MAF>0.01.
1	UK-ROI	All Ireland Warren 3 Genetics of Kidneys in Diabetes UK Collection [UK-ROI]	Broad Instiutte	Illumina Omni1-Quad array	GenomeStudio	SNP call rate <90%, MAF<1%, HWE p<10-8, missingness by haplotype (p<10-8), missingness by phenotype (p<10-8), evidence of plate differences (p<10-8). Sample call rate <95%, extremely high/low heterozygosity (>4 sd. from mean), first degree relatives, Admixture (visual evaluation),	0.95	0.9	1e-07	Impute2	1000G P1	PLINK	Logistic regression, additive model (on the log OR scale)
1	GoKinD US	Genetics of Kidneys in Diabetes US Study [GoKinD US]	Broad Instiutte	Affymetrix 500K	Birdseed algorithm	SNP call rate <90%, MAF<1%, HWE p<10-8, missingness by haplotype (p<10-8), missingness by phenotype (p<10-8), evidence of plate differences (p<10-8). Sample call rate <95%, extremely high/low heterozygosity (>4 sd. from mean), first degree relatives, Admixture (visual evaluation),	0.95	0.9	1e-07	Impute2	1000G P1	PLINK	Logistic regression, additive model (on the log OR scale)
1	French Danish effort		Broad Institute	Illumina Omni1	GenomeStudio	Sample call rate < 97%; SNP call rate < 99%; HWE p < 10-5; MAF<1%; phenotypic & genetic gender inconsistency; close relatedness or non European ancestry	0.99	0.99		MaCH	1000G (June 2011)	MaCH/R	Age+Gender+DiabetesDuration+ PCs+Study	131 SNPs for replication
1	DCCT/EDIC	Diabetes Control and Complications Trial/Epidemiology of Diabetes Interventions and Complications	Illumina (San Diego, CA)	Illumina Human1M	GenomeStudio	Excluded autosomal SNPs showing significant association with sex (P <10-8) or deviating from the Hardy-Weinberg equilibrium (P < 10-9). Removed SNPs from two regions known to have strong linkage disequilibrium (major histocompatibility complex, the polymorphic chromosome 8 inversion) and then selected independent SNPs, required to have r2 <0.2 over a shifting window of 500 kb, yielding ~98 K SNPs.	98.8	99.87	pre-imputation QC threshold 0.000000001	IMPUTE(v2.3)	1000 genomes, phase 1, version 3 and build 19	SNPTEST	logistic regresion, expected, frequentist, additive model
1	Joslin		Broad Institute	Illumina Omni-1 Quad	GenomeStudio	3-stage SNP call rate filter: minimum call rate <95%, 97% for MAF 5-10%, 99% for MAF 1-5%; MAF<1%; HWE p<10-8	99 %	99 %	1,00E-08	IMPUTEv2	1000G P1	SNPtest	SNPtest: --score --frequentist	133 [16/117]
1	FinnDiane replication	Finnish Diabetic Nephropathy Study	Folkhälsan Research Center	TaqMan		SNP call rate <0.9, MAF<5%, HWE p<0.05	NA	rs72809865: 234/3530 (0.93) rs11622435: 234/3530 (0.93) rs7562121: 226/3530 (0.94) rs61277444: 54/5804 (0.99)		NA	NA	plink	logistic regression, additive model	4/0
2	MDC	Malmo Diet and Cancer Study	Broad Institute, Cambridge, MA USA	Illumina HumanOmniExpress BeadChip v. 1	Autocall	During the quality control procedures (QC) we removed individuals having a call rate of <0.95, an inbreeding coefficient of > 3 SD away from mean, discordance between inferred and reported gender, duplicate samples, unexpected high proportion of IBD sharing, first and second degree relatives or deviating from the common population structure in the MDCS-CC (exceeding 8 sigma on first two principal…	<0.95	<0.95	<1x10-07	NA	NA	PLINK	Linear regression (eGFR), additive genetic model	135001
2	Inter99	Inter99	Copenhagen, Denmark	Illumina HumanExome-12v1	GenomeStudio Gen Call	SNP call rate <0.95, MAF<1%, HWE p<0.0001, gender inconsistency; close relatedness or non European ancestry	0.95	0.95	0.0001	NA	NA	plink	Linear regression (eGFR), additive genetic model	53435
2	Vejle Biobank	Vejle Biobank	Copenhagen, Denmark	Illumina HumanExome-12v1	GenomeStudio Gen Call	SNP call rate <0.95, MAF<1%, HWE p<0.0001, gender inconsistency; close relatedness or non European ancestry	0.95	0.95	0.0001	NA	NA	plink	Linear regression (eGFR), additive genetic model	53435
2	ADDITION	Anglo-Danish-Dutch study of Intensive Treatment In PeOple with screeN detected diabetes in primary care	Copenhagen, Denmark	Illumina HumanExome-12v1	GenomeStudio Gen Call	SNP call rate <0.95, MAF<1%, HWE p<0.0001, gender inconsistency; close relatedness or non European ancestry	0.95	0.95	0.0001	NA	NA	plink	Linear regression (eGFR), additive genetic model	53435
