# Supplementary material for: A Genome-Wide Association Study of Diabetic Kidney Disease in Subjects With Type 2 Diabetes
Source: Oxford University Press journal article supplement (doi:10.2337/db17-0914), 2018-04-27
Supplement: db170914supplementarydata4.xlsx [file db170914supplementarydata4.xlsx]

## Sheet: SuppTable5
CHR	BP	SNP	Discovery				Replication in European populations				Joint analysis			Phenotype
			EAF	OR (95%CI)	P	N	EAF	OR (95%CI)	P	N	OR (95%CI)	P	N
1	167820884	rs12036864	0.08	1.42 (1.16,1.73)	2.2e-06	5192	0.08	0.84 (0.65,1.10)	0.38	772	1.32 (1.11,1.57)	4e-05	5964	Diabetic kidney disease (DKD)
4	69713	rs7678633	0.92	1.49 (1.13,1.95)	4.4e-06	2800	0.92	0.85 (0.60,1.21)	0.18	2065	1.30 (1.05,1.60)	0.00026	4865	DKD
4	78711731	rs143267742	0.97	1.84 (1.60,2.12)	4.1e-06	4547	0.97	1.01 (0.64,1.58)	0.99	772	1.64 (1.42,1.89)	2e-05	5319	DKD
4	101507002	chr4:101507002:D	0.75	1.31 (1.21,1.41)	3.6e-06	5190	0.73	1.19 (1.00,1.41)	0.14	772	1.29 (1.20,1.38)	1.2e-06	5962	DKD
6	6415537	chr6:6415537:D	0.41	1.23 (1.11,1.36)	1.5e-06	5190	0.42	1.03 (0.85,1.25)	0.81	772	1.19 (1.09,1.31)	4.7e-06	5962	DKD
6	22068174	rs4145443	0.57	1.21 (1.10,1.34)	4.9e-06	5194	0.55	0.98 (0.81,1.18)	0.083	2065	1.17 (1.07,1.28)	2.8e-05	7259	DKD
6	63997318	rs2347470	0.49	1.20 (1.13,1.29)	1e-06	5191	0.48	0.94 (0.79,1.11)	0.53	772	1.16 (1.09,1.24)	1.5e-05	5963	DKD
6	89942934	rs2150814	0.64	1.20 (1.12,1.28)	2e-06	5191	0.64	1.10 (0.93,1.31)	0.36	772	1.18 (1.11,1.26)	1.8e-06	5963	DKD
6	89948232	rs9942471	0.64	1.20 (1.12,1.29)	4.8e-07	5194	0.62	1.12 (0.98,1.27)	0.14	1859	1.18 (1.11,1.25)	3.8e-07	7053	DKD
7	54679710	rs35818577	0.24	1.22 (1.08,1.37)	4.5e-06	5191	0.25	0.97 (0.79,1.20)	0.82	772	1.18 (1.06,1.31)	2.7e-05	5963	DKD
9	17504372	rs55750433	0.19	1.30 (1.13,1.49)	4.8e-06	5190	0.2	0.92 (0.75,1.13)	0.52	772	1.23 (1.09,1.39)	5.4e-05	5962	DKD
10	25713081	rs7916840	0.23	1.28 (1.19,1.39)	2.2e-06	5190	0.22	1.22 (0.94,1.58)	0.11	772	1.27 (1.19,1.37)	6.2e-07	5962	DKD
11	92741956	rs768920	0.05	1.48 (1.15,1.91)	3.4e-06	5191	0.05	1.18 (0.77,1.82)	0.19	2065	1.44 (1.14,1.80)	4.4e-06	7256	DKD
15	30372504	chr15:30372504:D	0.04	1.96 (1.23,3.11)	1.7e-06	4899	0.03	1.24 (0.73,2.08)	0.45	772	1.79 (1.22,2.63)	2.3e-06	5671	DKD
15	70302202	rs12592406	0.32	1.26 (1.17,1.35)	2.1e-06	5190	0.3	0.98 (0.80,1.19)	0.83	772	1.21 (1.13,1.30)	1.3e-05	5962	DKD
17	39098885	chr17:39098885:D	0.95	1.72 (1.52,1.94)	3.3e-06	4900	0.96	1.21 (0.87,1.69)	0.47	772	1.61 (1.43,1.82)	4.4e-06	5672	DKD
17	57003096	rs117462696	0.98	2.03 (1.75,2.34)	3.8e-06	4546	0.99	0.96 (0.51,1.80)	0.93	772	1.85 (1.59,2.15)	2.2e-05	5318	DKD
20	35620979	rs139484064	0.97	1.86 (1.64,2.11)	1.3e-06	4901	0.97	1.19 (0.81,1.73)	0.57	772	1.73 (1.53,1.96)	2.4e-06	5673	DKD
20	35698734	rs141804552	0.97	1.92 (1.68,2.18)	2.8e-06	4546	0.97	1.17 (0.79,1.73)	0.61	772	1.75 (1.54,2.00)	6.1e-06	5318	DKD
CHR	BP	SNP	Discovery				Replication in European and East Asian populations				Joint analysis			Phenotype
			EAF	OR (95%CI)	P	N	EAF	OR (95%CI)	P	N	OR (95%CI)	P	N
1	167820884	rs12036864	0.08	1.42 (1.16,1.73)	2.2e-06	5192	0.24	1.03 (0.96,1.10)	0.47	9875	1.09 (1.02,1.16)	0.00078	15067	DKD
2	97805602	rs182638570	0.98	3.69 (3.32,4.10)	1.3e-06	3253	0.88	0.99 (0.89,1.10)	0.79	11191	1.06 (0.96,1.17)	0.039	14444	DKD
4	69713	rs7678633	0.92	1.49 (1.13,1.95)	4.4e-06	2800	0.89	1.04 (0.94,1.14)	0.63	11168	1.12 (1.01,1.24)	0.013	13968	DKD
4	78711731	rs143267742	0.97	1.84 (1.60,2.12)	4.1e-06	4547	0.97	1.01 (0.64,1.58)	0.99	772	1.64 (1.42,1.89)	2e-05	5319	DKD
4	101507002	chr4:101507002:D	0.75	1.31 (1.21,1.41)	3.6e-06	5190	0.73	1.19 (1.00,1.41)	0.14	772	1.29 (1.20,1.38)	1.2e-06	5962	DKD
6	6415537	chr6:6415537:D	0.41	1.23 (1.11,1.36)	1.5e-06	5190	0.42	1.03 (0.85,1.25)	0.81	772	1.19 (1.09,1.31)	4.7e-06	5962	DKD
6	22068174	rs4145443	0.57	1.21 (1.10,1.34)	4.9e-06	5194	0.19	1.02 (0.95,1.11)	0.72	11168	1.11 (1.04,1.19)	0.0041	16362	DKD
6	63997318	rs2347470	0.49	1.20 (1.13,1.29)	1e-06	5191	0.44	0.98 (0.92,1.03)	0.46	9875	1.05 (1.00,1.10)	0.023	15066	DKD
6	89942934	rs2150814	0.64	1.20 (1.12,1.28)	2e-06	5191	0.93	1.06 (0.95,1.18)	0.33	9875	1.15 (1.08,1.22)	0.00033	15066	DKD
6	89948232	rs9942471	0.64	1.20 (1.12,1.29)	4.8e-07	5194	0.87	1.06 (0.98,1.15)	0.18	14059	1.13 (1.07,1.19)	0.00017	19253	DKD
7	54679710	rs35818577	0.24	1.22 (1.08,1.37)	4.5e-06	5191	0.18	0.98 (0.90,1.07)	0.62	9875	1.08 (1.01,1.16)	0.022	15066	DKD
9	17504372	rs55750433	0.19	1.30 (1.13,1.49)	4.8e-06	5190	0.17	0.93 (0.76,1.15)	0.9	1217	1.23 (1.09,1.39)	4.9e-05	6407	DKD
10	25713081	rs7916840	0.23	1.28 (1.19,1.39)	2.2e-06	5190	0.65	1.06 (1.00,1.13)	0.065	12972	1.11 (1.06,1.16)	4.3e-05	18162	DKD
11	92741956	rs768920	0.05	1.48 (1.15,1.91)	3.4e-06	5191	0.04	1.06 (0.91,1.23)	0.4	11168	1.21 (1.06,1.39)	0.00091	16359	DKD
13	86971561	rs183249293	0.98	2.40 (2.11,2.74)	2.4e-07	4546	0.98	1.23 (0.80,1.89)	0.33	7614	1.79 (1.57,2.06)	8.7e-05	12160	DKD
15	30372504	chr15:30372504:D	0.04	1.96 (1.23,3.11)	1.7e-06	4899	0.03	1.24 (0.73,2.08)	0.45	772	1.79 (1.22,2.63)	2.3e-06	5671	DKD
15	70302202	rs12592406	0.32	1.26 (1.17,1.35)	2.1e-06	5190	0.46	0.98 (0.90,1.06)	0.63	9173	1.10 (1.04,1.16)	0.014	14363	DKD
17	39098885	chr17:39098885:D	0.95	1.72 (1.52,1.94)	3.3e-06	4900	0.96	1.21 (0.87,1.69)	0.47	772	1.61 (1.43,1.82)	4.4e-06	5672	DKD
17	57003096	rs117462696	0.98	2.03 (1.75,2.34)	3.8e-06	4546	0.99	0.96 (0.51,1.80)	0.93	772	1.85 (1.59,2.15)	2.2e-05	5318	DKD
20	35620979	rs139484064	0.97	1.86 (1.64,2.11)	1.3e-06	4901	0.97	1.19 (0.81,1.73)	0.57	772	1.73 (1.53,1.96)	2.4e-06	5673	DKD
20	35698734	rs141804552	0.97	1.92 (1.68,2.18)	2.8e-06	4546	0.97	1.17 (0.79,1.73)	0.61	772	1.75 (1.54,2.00)	6.1e-06	5318	DKD
CHR	BP	SNP	Discovery				Replication in European populations				Joint analysis			Phenotype
			EAF	OR (95%CI)	P	N	EAF	OR (95%CI)	P	N	OR (95%CI)	P	N
6	89948232	rs9942471	0.64	1.24 (1.15,1.34)	2.1e-07	3762	0.59	1.32 (0.99,1.75)	0.059	1039	1.25 (1.16,1.34)	4.5e-08	4801	Microalbuminuria
CHR	BP	SNP	Discovery				Replication in European and East Asian populations				Joint analysis			Phenotype
			EAF	OR (95%CI)	P	N	EAF	OR (95%CI)	P	N	OR (95%CI)	P	N
6	89948232	rs9942471	0.64	1.24 (1.15,1.34)	2.1e-07	3762	0.85	1.11 (0.99,1.23)	0.91	1797	1.15 (1.08,1.23)	1.2e-05	5559	Microalbuminuria
CHR	BP	SNP	Discovery				Replication in European populations				Joint analysis			Phenotype
			EAF	OR (95%CI)	P	N	EAF	OR (95%CI)	P	N	OR (95%CI)	P	N
1	178667605	chr1:178667605:I	0.38	1.25 (1.09,1.43)	4.5e-06	3456	0.4	1.05 (0.86,1.27)	0.64	772	1.19 (1.07, 1.34)	1.4e-05	4228	Late DKD
1	237714763	rs2618659	0.1	1.67 (1.49,1.88)	3.4e-06	3456	0.08	1.08 (0.77,1.50)	0.69	772	1.49 (1.33, 1.67)	1.2e-05	4228	Late DKD
3	17170864	rs116354014	0.02	4.52 (0.62,32.87)	2.5e-07	2095	0.01	0.70 (0.46,1.05)	0.42	772	2.55 (0.96, 6.79)	6.7e-05	2867	Late DKD
3	17203329	rs74796791	0.03	2.24 (1.11,4.52)	1.2e-06	2934	0.01	1.27 (0.61,2.62)	0.59	772	2.04 (1.13, 3.70)	5e-06	3706	Late DKD
4	172841042	rs147523203	0.01	17.32 (0.00,684147.47)	5.9e-07	1685	0.01	0.59 (0.41,0.84)	0.26	772	3.10 (0.69,13.91)	0.00045	2457	Late DKD
5	34429754	rs6865390	0.06	1.82 (1.59,2.09)	3.8e-06	3226	0.06	1.46 (0.87,2.45)	0.41	1664	1.70 (1.50, 1.93)	2.2e-05	4890	Late DKD
5	55625333	rs158342	0.21	1.31 (1.19,1.44)	4.7e-06	3461	0.17	1.10 (0.88,1.37)	0.21	1660	1.25 (1.15, 1.36)	7.4e-06	5121	Late DKD
11	81277664	chr11:81277664:D	0.47	1.33 (1.16,1.52)	2.5e-06	3458	0.49	1.12 (0.91,1.37)	0.29	772	1.28 (1.14, 1.44)	2.6e-06	4230	Late DKD
11	88469683	rs7942230	0.57	1.30 (1.20,1.41)	2.2e-06	3456	0.59	0.86 (0.69,1.07)	0.14	772	1.18 (1.09, 1.28)	0.00026	4228	Late DKD
12	55768808	rs112479297	0.02	2.92 (0.99,8.64)	4.3e-06	2095	0.02	0.94 (0.57,1.54)	0.86	772	2.15 (1.06, 4.36)	0.00012	2867	Late DKD
12	115385481	rs75729013	0.24	1.34 (1.14,1.57)	4.5e-06	3457	0.22	1.06 (0.84,1.34)	0.64	772	1.27 (1.11, 1.46)	1.4e-05	4229	Late DKD
15	81906113	rs72743899	0.04	2.02 (1.17,3.47)	4.7e-06	2934	0.05	1.00 (0.69,1.45)	0.99	772	1.62 (1.12, 2.34)	4.5e-05	3706	Late DKD
CHR	BP	SNP	Discovery				Replication in European and East Asian populations				Joint analysis			Phenotype
			EAF	OR (95%CI)	P	N	EAF	OR (95%CI)	P	N	OR (95%CI)	P	N
1	178667605	chr1:178667605:I	0.38	1.25 (1.09,1.43)	4.5e-06	3456	0.4	1.05 (0.86,1.27)	0.64	772	1.19 (1.07, 1.34)	1.4e-05	4228	Late DKD
1	237714763	rs2618659	0.1	1.67 (1.49,1.88)	3.4e-06	3456	0.14	0.98 (0.87,1.10)	0.73	9505	1.12 (1.02, 1.23)	0.035	12961	Late DKD
3	17170864	rs116354014	0.02	4.52 (0.62, 32.87)	2.5e-07	2095	0.01	0.70 (0.46,1.05)	0.42	772	2.55 (0.96, 6.79)	6.7e-05	2867	Late DKD
3	17203329	rs74796791	0.03	2.24 (1.11,4.52)	1.2e-06	2934	0.01	1.27 (0.61,2.62)	0.59	772	2.04 (1.13, 3.70)	5e-06	3706	Late DKD
4	172841042	rs147523203	0.01	17.32 (0.00,684147.47)	5.9e-07	1685	0.01	0.59 (0.41,0.84)	0.26	772	3.10 (0.69,13.91)	0.00045	2457	Late DKD
5	34429754	rs6865390	0.06	1.82 (1.59,2.09)	3.8e-06	3226	0.15	1.01 (0.92,1.11)	0.94	10600	1.08 (0.99, 1.17)	0.022	13826	Late DKD
5	55625333	rs158342	0.21	1.31 (1.19,1.44)	4.7e-06	3461	0.19	1.14 (0.96,1.36)	0.07	2953	1.24 (1.15, 1.34)	4.4e-06	6414	Late DKD
11	81277664	chr11:81277664:D	0.47	1.33 (1.16,1.52)	2.5e-06	3458	0.67	1.09 (0.97,1.22)	0.15	6286	1.21 (1.10, 1.32)	7.2e-05	9744	Late DKD
11	88469683	rs7942230	0.57	1.30 (1.20,1.41)	2.2e-06	3456	0.64	1.00 (0.94,1.06)	0.8	11001	1.06 (1.01, 1.11)	0.037	14457	Late DKD
12	55768808	rs112479297	0.02	2.92 (0.99,8.64)	4.3e-06	2095	0.02	0.94 (0.57,1.54)	0.86	772	2.15 (1.06, 4.36)	0.00012	2867	Late DKD
12	115385481	rs75729013	0.24	1.34 (1.14,1.57)	4.5e-06	3457	0.06	0.99 (0.88,1.12)	0.75	9173	1.15 (1.04, 1.27)	0.033	12630	Late DKD
15	81906113	rs72743899	0.04	2.02 (1.17,3.47)	4.7e-06	2934	0.05	1.00 (0.69,1.45)	0.99	772	1.62 (1.12, 2.34)	4.5e-05	3706	Late DKD
CHR	BP	SNP	Discovery				Replication in European populations				Joint analysis			Phenotype
			EAF	OR (95%CI)	P	N	EAF	OR (95%CI)	P	N	OR (95%CI)	P	N
13	60070065	rs73206603	0.05	2.26 (1.11, 4.62)	1.9e-07	3034	0.08	1.41 (0.87,2.29)	0.11	983	1.83 (1.17, 2.87)	1.1e-07	4017	End,stage renal disease vs controls
15	74103960	rs117897666	0.03	4.11 (0.54,31.08)	3.4e-06	2820	0.03	2.18 (0.73,6.47)	0.027	983	3.02 (0.95, 9.59)	3e-07	3803	ESRD vs controls
CHR	BP	SNP	Discovery				Replication in European populations				Joint analysis			Phenotype
			EAF	OR (95%CI)	P	N	EAF	OR (95%CI)	P	N	OR (95%CI)	P	N
2	45292643	rs57398039	0.04	2.63 (0.97, 7.12)	9.7e-07	3032	0.04	0.66 (0.49,0.89)	0.17	983	1.53 (0.95, 2.46)	0.00035	4015	ESRD vs no ESRD
2	114732241	rs12472051	0.12	1.62 (1.13, 2.34)	3.4e-06	4327	0.11	1.20 (0.94,1.54)	0.31	983	1.47 (1.12, 1.92)	3.7e-06	5310	ESRD vs no ESRD
3	12255390	rs73017308	0.05	2.02 (1.06, 3.87)	1.4e-06	4326	0.05	1.09 (0.72,1.65)	0.73	983	1.58 (1.05, 2.38)	6.6e-06	5309	ESRD vs no ESRD
3	121057455	rs2331712	0.12	1.79 (1.20, 2.66)	4.1e-06	4328	0.1	1.05 (0.79,1.41)	0.8	983	1.51 (1.14, 2.00)	2e-05	5311	ESRD vs no ESRD
3	129309455	rs16861373	0.12	1.62 (1.40, 1.88)	2.6e-06	4327	0.13	0.99 (0.74,1.31)	0.94	983	1.34 (1.16, 1.54)	2.6e-05	5310	ESRD vs no ESRD
4	108841562	rs13115879	0.03	2.85 (0.97, 8.42)	4.2e-06	2820	0.03	0.96 (0.61,1.51)	0.9	983	1.94 (1.04, 3.60)	9.6e-05	3803	ESRD vs no ESRD
6	23241658	rs9348554	0.09	1.95 (1.17, 3.25)	3.5e-07	3033	0.1	0.83 (0.57,1.22)	0.35	983	1.40 (1.04, 1.89)	7.4e-05	4016	ESRD vs no ESRD
6	41487357	rs36025606	0.15	1.68 (1.20, 2.35)	1.1e-06	4327	0.13	1.10 (0.80,1.51)	0.58	983	1.48 (1.15, 1.90)	3.5e-06	5310	ESRD vs no ESRD
6	139324875	rs11961816	0.04	3.07 (0.98, 9.62)	1.6e-07	3032	0.06	1.11 (0.80,1.53)	0.67	983	1.81 (1.10, 2.97)	1.9e-06	4015	ESRD vs no ESRD
7	15067232	rs12540132	0.06	2.14 (1.05, 4.33)	4e-06	4326	0.04	0.74 (0.53,1.03)	0.32	983	1.52 (0.99, 2.33)	0.00019	5309	ESRD vs no ESRD
7	51066779	rs149034284	0.03	3.89 (0.59,25.50)	1e-06	2820	0.01	1.06 (0.58,1.94)	0.9	983	2.37 (0.91, 6.18)	1.9e-05	3803	ESRD vs no ESRD
7	119888759	rs79214379	0.06	2.92 (1.01, 8.41)	2.9e-06	4326	0.05	1.10 (0.70,1.72)	0.74	983	1.93 (1.10, 3.36)	1.3e-05	5309	ESRD vs no ESRD
9	20184331	rs4977388	0.07	2.28 (1.11, 4.67)	8.7e-07	2821	0.08	1.47 (0.90,2.43)	0.14	2102	1.87 (1.18, 2.94)	2.6e-06	4923	ESRD vs no ESRD
9	26447335	rs10812398	0.03	2.85 (0.80,10.18)	1.2e-06	3034	0.06	0.96 (0.68,1.37)	0.88	983	1.44 (0.93, 2.22)	3.5e-05	4017	ESRD vs no ESRD
9	139031913	rs141052170	0.06	2.28 (1.01, 5.12)	2e-06	2820	0.02	1.66 (0.65,4.27)	0.24	983	2.13 (1.07, 4.23)	2.7e-06	3803	ESRD vs no ESRD
10	102857298	rs117081694	0.03	4.48 (0.59,34.13)	1.5e-06	2821	0.03	0.77 (0.54,1.10)	0.42	983	1.92 (0.97, 3.78)	0.00019	3804	ESRD vs no ESRD
11	65035825	chr11:65035825:I	0.05	2.95 (0.83,10.44)	3.2e-06	2821	0.06	1.03 (0.69,1.55)	0.92	983	1.72 (0.98, 3.00)	4.8e-05	3804	ESRD vs no ESRD
12	102323882	rs73178516	0.04	2.80 (0.99, 7.93)	2.5e-06	3033	0.04	0.90 (0.56,1.45)	0.73	983	1.77 (1.04, 3.01)	8.8e-05	4016	ESRD vs no ESRD
13	60070065	rs73206603	0.05	2.26 (1.11, 4.62)	1.9e-07	3034	0.08	1.41 (0.87,2.29)	0.11	983	1.83 (1.17, 2.87)	1.1e-07	4017	ESRD vs no ESRD
13	97768474	rs7332323	0.25	1.51 (1.34, 1.69)	2.4e-06	4325	0.26	0.96 (0.76,1.21)	0.76	983	1.28 (1.15, 1.43)	3.7e-05	5308	ESRD vs no ESRD
14	95189723	chr14:95189723:D	0.05	3.18 (0.87,11.57)	1e-06	2820	0.08	1.22 (0.78,1.91)	0.41	983	1.86 (1.08, 3.19)	3.7e-06	3803	ESRD vs no ESRD
15	74103960	rs117897666	0.03	4.11 (0.54,31.08)	3.4e-06	2820	0.03	2.18 (0.73,6.47)	0.027	983	3.02 (0.95, 9.59)	3e-07	3803	ESRD vs no ESRD
19	35091356	rs76262407	0.02	5.54 (0.41,75.31)	1.1e-07	2822	0.02	1.17 (0.68,2.02)	0.77	983	3.56 (0.81,15.69)	2.4e-06	3805	ESRD vs no ESRD
19	35137920	rs113207073	0.02	4.32 (0.59,31.72)	1.4e-06	2821	0.01	0.60 (0.17,2.08)	0.47	983	3.08 (0.82,11.63)	0.00015	3804	ESRD vs no ESRD
19	51161088	rs10404821	0.64	1.33 (1.08, 1.63)	2.7e-06	4327	0.68	1.15 (0.96,1.37)	0.11	2113	1.26 (1.08, 1.48)	2.1e-06	6440	ESRD vs no ESRD
20	212528	rs73600384	0.07	2.28 (1.11, 4.69)	3.6e-06	2821	0.06	0.74 (0.55,0.98)	0.23	983	1.50 (1.01, 2.21)	0.00073	3804	ESRD vs no ESRD
21	47556793	rs12774	0.28	1.46 (1.30, 1.65)	4.8e-06	4325	0.31	0.90 (0.71,1.15)	0.43	983	1.22 (1.09, 1.37)	0.00015	5308	ESRD vs no ESRD
CHR	BP	SNP	Discovery				Replication in European and East Asian populations				Joint analysis			Phenotype
			EAF	OR (95%CI)	P	N	EAF	OR (95%CI)	P	N	OR (95%CI)	P	N
2	45292643	rs57398039	0.04	2.63 (0.97, 7.12)	9.7e-07	3032	0.05	0.55 (0.44,0.68)	0.019	1401	1.29 (0.88, 1.90)	0.0064	4433	ESRD vs no ESRD
2	114732241	rs12472051	0.12	1.62 (1.13, 2.34)	3.4e-06	4327	0.11	1.20 (0.94,1.54)	0.31	983	1.47 (1.12, 1.92)	3.7e-06	5310	ESRD vs no ESRD
3	12255390	rs73017308	0.05	2.02 (1.06, 3.87)	1.4e-06	4326	0.05	1.09 (0.72,1.65)	0.73	983	1.58 (1.05, 2.38)	6.6e-06	5309	ESRD vs no ESRD
3	121057455	rs2331712	0.12	1.79 (1.20, 2.66)	4.1e-06	4328	0.1	1.05 (0.79,1.41)	0.8	983	1.51 (1.14, 2.00)	2e-05	5311	ESRD vs no ESRD
3	129309455	rs16861373	0.12	1.62 (1.40, 1.88)	2.6e-06	4327	0.21	0.98 (0.76,1.27)	0.91	1401	1.30 (1.13, 1.49)	5.5e-05	5728	ESRD vs no ESRD
4	108841562	rs13115879	0.03	2.85 (0.97, 8.42)	4.2e-06	2820	0.03	0.96 (0.61,1.51)	0.9	983	1.94 (1.04, 3.60)	9.6e-05	3803	ESRD vs no ESRD
6	23241658	rs9348554	0.09	1.95 (1.17, 3.25)	3.5e-07	3033	0.11	0.82 (0.57,1.18)	0.26	1401	1.35 (1.02, 1.78)	0.00034	4434	ESRD vs no ESRD
6	41487357	rs36025606	0.15	1.68 (1.20, 2.35)	1.1e-06	4327	0.11	1.10 (0.81,1.49)	0.67	1401	1.47 (1.14, 1.88)	8.6e-06	5728	ESRD vs no ESRD
6	139324875	rs11961816	0.04	3.07 (0.98, 9.62)	1.6e-07	3032	0.08	1.12 (0.83,1.50)	0.59	1401	1.72 (1.10, 2.68)	3.6e-06	4433	ESRD vs no ESRD
7	15067232	rs12540132	0.06	2.14 (1.05, 4.33)	4e-06	4326	0.04	0.74 (0.53,1.03)	0.32	983	1.52 (0.99, 2.33)	0.00019	5309	ESRD vs no ESRD
7	51066779	rs149034284	0.03	3.89 (0.59,25.50)	1e-06	2820	0.01	1.06 (0.58,1.94)	0.9	983	2.37 (0.91, 6.18)	1.9e-05	3803	ESRD vs no ESRD
7	119888759	rs79214379	0.06	2.92 (1.01, 8.41)	2.9e-06	4326	0.05	1.10 (0.70,1.72)	0.74	983	1.93 (1.10, 3.36)	1.3e-05	5309	ESRD vs no ESRD
9	20184331	rs4977388	0.07	2.28 (1.11, 4.67)	8.7e-07	2821	0.14	1.20 (0.84,1.72)	0.36	2520	1.62 (1.12, 2.34)	2.6e-05	5341	ESRD vs no ESRD
9	26447335	rs10812398	0.03	2.85 (0.80,10.18)	1.2e-06	3034	0.09	0.91 (0.67,1.23)	0.63	1401	1.30 (0.90, 1.89)	0.00019	4435	ESRD vs no ESRD
9	139031913	rs141052170	0.06	2.28 (1.01, 5.12)	2e-06	2820	0.02	1.66 (0.65,4.27)	0.24	983	2.13 (1.07, 4.23)	2.7e-06	3803	ESRD vs no ESRD
10	102857298	rs117081694	0.03	4.48 (0.59,34.13)	1.5e-06	2821	0.03	0.77 (0.54,1.10)	0.42	983	1.92 (0.97, 3.78)	0.00019	3804	ESRD vs no ESRD
11	65035825	chr11:65035825:I	0.05	2.95 (0.83,10.44)	3.2e-06	2821	0.06	1.03 (0.69,1.55)	0.92	983	1.72 (0.98, 3.00)	4.8e-05	3804	ESRD vs no ESRD
12	102323882	rs73178516	0.04	2.80 (0.99, 7.93)	2.5e-06	3033	0.04	0.90 (0.56,1.45)	0.73	983	1.77 (1.04, 3.01)	8.8e-05	4016	ESRD vs no ESRD
13	60070065	rs73206603	0.05	2.26 (1.11, 4.62)	1.9e-07	3034	0.08	1.41 (0.87,2.29)	0.11	983	1.83 (1.17, 2.87)	1.1e-07	4017	ESRD vs no ESRD
13	97768474	rs7332323	0.25	1.51 (1.34, 1.69)	2.4e-06	4325	0.28	0.95 (0.76,1.19)	0.64	1401	1.26 (1.13, 1.41)	0.00011	5726	ESRD vs no ESRD
14	95189723	chr14:95189723:D	0.05	3.18 (0.87,11.57)	1e-06	2820	0.08	1.22 (0.78,1.91)	0.41	983	1.86 (1.08, 3.19)	3.7e-06	3803	ESRD vs no ESRD
15	74103960	rs117897666	0.03	4.11 (0.54,31.08)	3.4e-06	2820	0.03	2.18 (0.73,6.47)	0.027	983	3.02 (0.95, 9.59)	3e-07	3803	ESRD vs no ESRD
19	35091356	rs76262407	0.02	5.54 (0.41,75.31)	1.1e-07	2822	0.04	1.03 (0.61,1.74)	0.92	1401	2.81 (0.94, 8.35)	1.1e-05	4223	ESRD vs no ESRD
19	35137920	rs113207073	0.02	4.32 (0.59,31.72)	1.4e-06	2821	0.03	0.77 (0.35,1.67)	0.5	1401	2.50 (0.92, 6.79)	0.00036	4222	ESRD vs no ESRD
19	51161088	rs10404821	0.64	1.33 (1.08, 1.63)	2.7e-06	4327	0.7	1.12 (0.94,1.34)	0.23	2531	1.25 (1.07, 1.46)	8.6e-06	6858	ESRD vs no ESRD
20	212528	rs73600384	0.07	2.28 (1.11, 4.69)	3.6e-06	2821	0.1	0.74 (0.58,0.96)	0.17	1401	1.38 (0.98, 1.95)	0.0027	4222	ESRD vs no ESRD
21	47556793	rs12774	0.28	1.46 (1.30, 1.65)	4.8e-06	4325	0.37	0.89 (0.71,1.12)	0.33	1401	1.20 (1.07, 1.34)	0.00048	5726	ESRD vs no ESRD
CHR	BP	SNP	Discovery				Replication in European populations				Joint analysis			Phenotype
			EAF	OR (95%CI)	P	N	EAF	OR (95%CI)	P	N	OR (95%CI)	P	N
1	6035430	rs75886247	0.95	1.53 (1.34,1.75)	2.9e-06	4948	0.94	1.29 (1.03,1.61)	0.14	3356	1.45 (1.29,1.63)	5.4e-06	8304	Chronic kideny disease (CKD)
1	96187047	rs75654205	0.03	1.69 (1.07,2.66)	4e-06	4676	0.03	0.69 (0.42,1.13)	0.082	3356	1.22 (0.93,1.60)	0.017	8032	CKD
2	234477131	rs145099760	0.99	5.65 (5.20,6.14)	1.9e-06	3029	0.01	0.95 (0.58,1.54)	0.89	3356	2.61 (2.25,3.02)	0.0015	6385	CKD
7	36282495	rs196537	0.14	1.34 (1.21,1.47)	4.1e-06	4950	0.09	0.83 (0.68,1.02)	0.21	3356	1.22 (1.11,1.34)	0.0058	8306	CKD
7	105345947	rs17151401	0.12	1.33 (1.12,1.58)	2.6e-06	4951	0.1	1.25 (1.03,1.51)	0.11	3356	1.31 (1.12,1.53)	3.4e-06	8307	CKD
7	109219912	rs2293280	0.93	1.38 (1.23,1.55)	8.7e-08	4949	0.94	0.97 (0.73,1.29)	0.89	3356	1.29 (1.15,1.44)	5.3e-05	8305	CKD
7	133744142	rs34346121	0.56	1.17 (1.09,1.26)	8.1e-07	4951	0.54	1.02 (0.89,1.18)	0.79	3356	1.13 (1.06,1.21)	7e-05	8307	CKD
8	71374039	rs145227904	0.89	1.43 (1.30,1.57)	9.7e-07	4950	0.89	0.97 (0.77,1.24)	0.86	3356	1.31 (1.20,1.44)	0.00024	8306	CKD
8	103066952	chr8:103066952:I	0.36	1.23 (1.15,1.33)	1.2e-06	4948	0.68	1.10 (0.92,1.31)	0.29	3356	1.20 (1.13,1.29)	9.6e-06	8304	CKD
10	126237577	rs12251637	0.04	1.65 (1.19,2.31)	5.4e-07	4675	0.06	1.19 (0.84,1.69)	0.32	3356	1.50 (1.16,1.94)	8e-06	8031	CKD
12	69307467	rs78779121	0.03	1.86 (1.12,3.08)	4.9e-06	4677	0.02	1.09 (0.70,1.69)	0.77	3356	1.60 (1.09,2.35)	0.00024	8033	CKD
12	94282149	rs11107237	0.46	1.20 (1.12,1.30)	4e-06	4948	0.49	1.03 (0.90,1.19)	0.69	3356	1.16 (1.08,1.24)	0.00014	8304	CKD
13	108176115	rs16970584	0.77	1.23 (1.13,1.33)	2.1e-06	4952	0.77	0.91 (0.80,1.03)	0.2	5605	1.11 (1.03,1.20)	0.02	10557	CKD
14	49648584	rs61981778	0.05	1.57 (1.14,2.15)	5.2e-07	4675	0.06	1.08 (0.82,1.43)	0.69	3356	1.41 (1.10,1.80)	4.4e-05	8031	CKD
16	15381348	rs117770357	0.08	1.34 (1.07,1.68)	2.2e-06	4949	0.09	1.08 (0.86,1.35)	0.6	3356	1.26 (1.05,1.50)	6.7e-05	8305	CKD
18	10444655	rs206439	0.54	1.21 (1.09,1.35)	1.1e-07	4951	0.53	1.00 (0.88,1.15)	0.96	3356	1.15 (1.06,1.25)	3.5e-05	8307	CKD
18	67383583	rs12969527	0.95	1.55 (1.36,1.77)	3.7e-06	4676	0.95	1.03 (0.79,1.35)	0.86	3356	1.36 (1.20,1.54)	0.00027	8032	CKD
19	6312290	rs72981971	0.85	1.32 (1.18,1.48)	4.9e-06	4948	0.82	1.09 (0.92,1.28)	0.34	5634	1.20 (1.09,1.32)	0.00013	10582	CKD
20	9351150	rs2206136	0.42	1.20 (1.08,1.34)	2.1e-08	4949	0.4	1.02 (0.91,1.15)	0.69	6951	1.13 (1.05,1.21)	9e-05	11900	CKD
21	29591307	chr21:29591307:I	0.98	2.98 (2.61,3.41)	2.1e-06	3029	0.98	0.87 (0.61,1.24)	0.62	3356	1.63 (1.35,1.96)	0.0036	6385	CKD
CHR	BP	SNP	Discovery				Replication in European and East Asian populations				Joint analysis			Phenotype
			EAF	OR (95%CI)	P	N	EAF	OR (95%CI)	P	N	OR (95%CI)	P	N
1	6035430	rs75886247	0.95	1.53 (1.34,1.75)	2.9e-06	4948	0.94	1.29 (1.03,1.61)	0.14	3356	1.45 (1.29,1.63)	5.4e-06	8304	CKD
1	96187047	rs75654205	0.03	1.69 (1.07,2.66)	4e-06	4676	0.03	0.69 (0.42,1.13)	0.082	3356	1.22 (0.93,1.60)	0.017	8032	CKD
2	234477131	rs145099760	0.99	5.65 (5.20,6.14)	1.9e-06	3029	0.01	0.95 (0.58,1.54)	0.89	3356	2.61 (2.25,3.02)	0.0015	6385	CKD
7	36282495	rs196537	0.14	1.34 (1.21,1.47)	4.1e-06	4950	0.21	0.99 (0.87,1.14)	0.58	5155	1.16 (1.07,1.26)	0.0046	10105	CKD
7	105345947	rs17151401	0.12	1.33 (1.12,1.58)	2.6e-06	4951	0.1	1.08 (0.91,1.29)	0.32	4583	1.25 (1.09,1.43)	4.7e-05	9534	CKD
7	109219912	rs2293280	0.93	1.38 (1.23,1.55)	8.7e-08	4949	0.94	1.05 (0.84,1.32)	0.63	4583	1.26 (1.13,1.40)	2.8e-05	9532	CKD
7	133744142	rs34346121	0.56	1.17 (1.09,1.26)	8.1e-07	4951	0.54	1.04 (0.93,1.16)	0.45	5155	1.12 (1.05,1.19)	6.6e-05	10106	CKD
8	71374039	rs145227904	0.89	1.43 (1.30,1.57)	9.7e-07	4950	0.89	0.97 (0.77,1.24)	0.86	3356	1.31 (1.20,1.44)	0.00024	8306	CKD
8	103066952	chr8:103066952:I	0.36	1.23 (1.15,1.33)	1.2e-06	4948	0.7	1.01 (0.88,1.17)	0.77	4103	1.17 (1.09,1.25)	0.00015	9051	CKD
10	126237577	rs12251637	0.04	1.65 (1.19,2.31)	5.4e-07	4675	0.12	1.15 (0.96,1.37)	0.19	5154	1.30 (1.11,1.54)	1.1e-05	9829	CKD
12	69307467	rs78779121	0.03	1.86 (1.12,3.08)	4.9e-06	4677	0.02	1.09 (0.70,1.69)	0.77	3356	1.60 (1.09,2.35)	0.00024	8033	CKD
12	94282149	rs11107237	0.46	1.20 (1.12,1.30)	4e-06	4948	0.54	0.98 (0.86,1.12)	0.88	4103	1.13 (1.06,1.21)	0.00095	9051	CKD
13	108176115	rs16970584	0.77	1.23 (1.13,1.33)	2.1e-06	4952	0.75	0.94 (0.85,1.05)	0.31	7404	1.09 (1.02,1.17)	0.027	12356	CKD
14	49648584	rs61981778	0.05	1.57 (1.14,2.15)	5.2e-07	4675	0.06	1.08 (0.82,1.43)	0.69	3356	1.41 (1.10,1.80)	4.4e-05	8031	CKD
16	15381348	rs117770357	0.08	1.34 (1.07,1.68)	2.2e-06	4949	0.09	1.08 (0.86,1.35)	0.6	3356	1.26 (1.05,1.50)	6.7e-05	8305	CKD
18	10444655	rs206439	0.54	1.21 (1.09,1.35)	1.1e-07	4951	0.53	1.02 (0.91,1.14)	0.71	5155	1.14 (1.05,1.23)	6.7e-05	10106	CKD
18	67383583	rs12969527	0.95	1.55 (1.36,1.77)	3.7e-06	4676	0.95	1.04 (0.80,1.36)	0.56	3749	1.36 (1.20,1.54)	0.00013	8425	CKD
19	6312290	rs72981971	0.85	1.32 (1.18,1.48)	4.9e-06	4948	0.81	1.06 (0.91,1.23)	0.4	6381	1.17 (1.07,1.28)	0.00026	11329	CKD
20	9351150	rs2206136	0.42	1.20 (1.08,1.34)	2.1e-08	4949	0.39	1.03 (0.94,1.13)	0.68	8750	1.12 (1.05,1.19)	0.00021	13813	CKD
21	29591307	chr21:29591307:I	0.98	2.98 (2.61,3.41)	2.1e-06	3029	0.98	0.87 (0.61,1.24)	0.62	3356	1.63 (1.35,1.96)	0.0036	6385	CKD
CHR	BP	SNP	Discovery				Replication in European populations				Joint analysis			Phenotype
			EAF	OR (95%CI)	P	N	EAF	OR (95%CI)	P	N	OR (95%CI)	P	N
1	55472365	rs4927186	0.51	1.47 (1.33,1.62)	2.2e-06	2245	0.49	1.13 (0.75,1.71)	0.6	573	1.43 (1.30,1.57)	8.1e-06	2818	Chronic kidney disease and diabetic kidney disease
4	137999526	rs12647735	0.57	1.47 (1.34,1.61)	1.8e-06	2246	0.61	1.27 (0.95,1.71)	0.31	573	1.45 (1.33,1.59)	2.1e-06	2819	CKD and DKD
CHR	BP	SNP	Discovery				Replication in European and East Asian populations				Joint analysis			Phenotype
			EAF	OR (95%CI)	P	N	EAF	OR (95%CI)	P	N	OR (95%CI)	P	N
1	55472365	rs4927186	0.51	1.47 (1.33,1.62)	2.2e-06	2245	0.52	1.00 (0.77,1.30)	0.84	767	1.36 (1.24,1.49)	2.8e-05	3012	CKD and DKD
1	217863821	chr1:217863821:I	0.38	1.44 (1.30,1.60)	4.5e-06	2243	0.87	0.56 (0.27,1.17)	0.032	194	1.33 (1.19,1.48)	0.00015	2437	CKD and DKD
2	119893700	rs12623644	0.63	1.41 (1.28,1.57)	2.1e-06	2243	0.59	0.85 (0.56,1.28)	0.44	194	1.33 (1.20,1.47)	1.5e-05	2437	CKD and DKD
4	137999526	rs12647735	0.57	1.47 (1.34,1.61)	1.8e-06	2246	0.69	1.00 (0.83,1.21)	0.81	1667	1.30 (1.19,1.42)	0.00016	3913	CKD and DKD
6	145587882	rs11970013	0.15	1.42 (1.09,1.86)	4.1e-06	2246	0.25	0.78 (0.58,1.06)	0.33	194	1.30 (1.04,1.63)	3.4e-05	2440	CKD and DKD
8	117973852	rs6997279	0.25	1.51 (1.20,1.91)	2.2e-07	2244	0.33	1.31 (0.82,2.09)	0.24	194	1.48 (1.19,1.84)	1.2e-07	2438	CKD and DKD
16	86275976	rs1704504	0.65	1.43 (1.30,1.58)	2.7e-06	2243	0.41	0.93 (0.62,1.39)	0.76	194	1.37 (1.24,1.52)	9.9e-06	2437	CKD and DKD
19	48475266	chr19:48475266:I	0.34	1.45 (1.31,1.60)	1.8e-06	2243	0.37	0.94 (0.63,1.39)	0.79	194	1.38 (1.25,1.53)	6.7e-06	2437	CKD and DKD
21	22510239	rs2245652	0.31	1.47 (1.18,1.83)	3.5e-06	2262	0.5	0.98 (0.70,1.36)	0.92	194	1.39 (1.15,1.69)	9.7e-06	2456	CKD and DKD
CHR	BP	SNP	Discovery				Replication in European populations				Joint analysis			Phenotype
			EAF	BETA (95%CI)	P	N	EAF	BETA (95%CI)	P	N	BETA (95%CI)	P	N
5	87847586	rs17421627	0.07	4.26 (2.18,6.35)	6.1e-05	9197	0.06	0.71 (0.98,2.41)	0.91	6554	2.12 (0.81, 3.44)	0.0015	15751	eGFR
6	71289189	rs1048886	0.82	2.53 (1.19, 3.88)	0.00022	9197	0.77	-0.45 (-1.68,0.77)	0.84	3145	0.90 (0.00, 1.81)	0.051	12342	eGFR
7	151415041	rs10224002	0.73	2.11 (0.94,3.29)	0.00042	9192	0.73	2.15 (0.93,3.37)	0.000576	3146	2.13 (1.28,2.98)	8.45e-07	12338	eGFR
16	20364588	rs4293393	0.18	2.53 (1.22,3.84)	0.00015	9196	0.26	2.71 (1.53,3.89)	0.0039	3135	2.63 (1.75, 3.51)	4.3e-09	12331	eGFR
16	20365654	rs13333226	0.18	2.58 (1.27,3.90 )	0.00011	9192	0.26	2.75 (1.57,3.93)	0.0028	3144	2.68 (1.80, 3.55)	2.3e-09	12336	eGFR
16	20367690	rs12917707	0.18	2.57 (1.24, 3.90)	0.00015	9197	0.21	1.60 (0.65,2.55)	0.11	6549	1.93 (1.15, 2.70)	1e-06	15746	eGFR
16	20400839	rs11864909	0.28	2.42 (1.29, 3.55)	2.7e-05	9197	0.34	2.22 (1.16,3.28)	4.1e-05	3146	2.31 (1.54, 3.09)	4.6e-09	12343	eGFR
CHR	BP	SNP	Discovery				Replication in European and East Asian populations				Joint analysis			Phenotype
			EAF	BETA (95%CI)	P	N	EAF	BETA (95%CI)	P	N	BETA (95%CI)	P	N
2	65923957	rs9678488	0.6	2.50 (1.44,3.55)	3.4e-06	9187	0.55	-0.09 (-1.36, 1.17)	0.89	1670	1.44 (0.63, 2.25)	0.00051	10857	eGFR
2	126606095	rs4289202	0.67	2.52 (1.44, 3.60)	4.7e-06	9197	0.99	2.04 (-5.57, 9.65)	0.6	1670	2.51 (1.44, 3.58)	4.2e-06	10867	eGFR
3	121815461	rs9289187	0.54	2.53 (1.51,3.55)	1.1e-06	9193	0.32	-0.04 (-1.40, 1.32)	0.95	1670	1.61 (0.79, 2.42)	0.00011	10863	eGFR
5	87744014	rs115114609	0.06	5.87 (3.49, 8.24)	1.2e-06	9197	0	4.93 (-3.81,13.68)	0.27	7405	5.80 (3.51, 8.09)	6.9e-07	16602	eGFR
5	87847586	rs17421627	0.07	4.26 (2.18,6.35)	6.1e-05	9197	0.05	1.16 (-0.45, 2.77)	0.16	8224	2.32 (1.05, 3.60)	0.00036	17421	eGFR
6	71289189	rs1048886	0.82	2.53 (1.19, 3.88)	0.00022	9197	0.83	-0.55 (-1.65, 0.54)	0.32	4815	0.68 (-0.17, 1.53)	0.12	14012	eGFR
7	151184920	rs17635967	0.07	5.15 (3.14,7.17)	5.4e-07	9197	0	-9.03 (-26.83, 8.77)	0.32	5735	4.97 (2.97, 6.98)	1.2e-06	14932	eGFR
7	151415041	rs10224002	0.73	2.11 (0.94,3.29)	0.00042	9192	0.83	2.42 (1.28, 4.16)	3.17e-05	4816	2.27 (1.45,3.09)	5.37e-08	14008	eGFR
9	71766593	rs11145465	0.22	2.70 (1.45, 3.95)	2.3e-05	9195	0.01	3.08 (-5.66,11.82)	0.49	1670	2.71 (1.47, 3.94)	1.9e-05	10865	eGFR
9	71791547	rs1538583	0.21	2.95 (1.70,4.21)	4.2e-06	9190	0.01	2.64 (-5.84,11.13)	0.54	1670	2.95 (1.70, 4.19)	3.5e-06	10860	eGFR
10	82488097	rs4036803	0.99	13.64 (8.60,18.67)	1.1e-07	8890	0.85	1.29 (-0.52, 3.11)	0.16	1670	2.72 (1.01, 4.42)	0.0019	10560	eGFR
13	65150012	rs9528790	0.27	2.76 (1.60,3.91)	2.7e-06	9197	0.26	-0.22 (-1.72, 1.28)	0.77	1670	1.66 (0.74, 2.57)	0.00039	10867	eGFR
14	98473034	rs35610905	0.97	6.81 (3.99, 9.62)	2.2e-06	9197	0.8	-0.14 (-1.76, 1.47)	0.86	1670	1.57 (0.17, 2.97)	0.028	10867	eGFR
16	352736	rs1204042	0.8	2.96 (1.70,4.23)	4.5e-06	9192	0.98	0.08 (,4.16, 4.32)	0.97	1669	2.73 (1.51, 3.94)	1.1e-05	10861	eGFR
16	20364588	rs4293393	0.18	2.53 (1.22,3.84)	0.00015	9196	0.2	2.54 ( 1.49, 3.60)	2.5e-06	4804	2.54 (1.72, 3.36)	1.6e-09	14000	eGFR
16	20365654	rs13333226	0.18	2.58 (1.27,3.90 )	0.00011	9192	0.2	2.57 ( 1.52, 3.63)	1.8e-06	4814	2.58 (1.75, 3.40)	8.6e-10	14006	eGFR
16	20367690	rs12917707	0.18	2.57 (1.24, 3.90)	0.00015	9197	0.17	1.66 ( 0.72, 2.60)	0.00053	8219	1.96 (1.20, 2.73)	5.4e-07	17416	eGFR
16	20400839	rs11864909	0.28	2.42 (1.29, 3.55)	2.7e-05	9197	0.18	2.30 ( 1.48, 3.12)	3.6e-08	10550	2.34 (1.68, 3.00)	4.4e-12	19747	eGFR
16	74076252	rs2716601	0.38	2.08 (1.03,3.13)	0.00011	9197	0.56	0.24 (-1.02, 1.50)	0.71	1669	1.32 (0.52, 2.13)	0.0013	10866	eGFR
