# Supplementary material for: A Genome-Wide Association Study of Diabetic Kidney Disease in Subjects With Type 2 Diabetes
Source: Oxford University Press journal article supplement (doi:10.2337/db17-0914), 2018-04-27
Supplement: db170914supplementarydata5.xlsx [file db170914supplementarydata5.xlsx]

## Sheet: SuppTable9
CHR	BP	SNP	Discovery					Replication in Europeans			Joint analysis				Phenotype
			EAF	OR (95%CI)	P	N	EAF	OR (95%CI)	P	N	EAF	OR (95%CI)	P	N
1	74437601	rs189637027	0.86	1.31 (1.21,1.41)	6.1e-08	10547	0.86	1.02 (0.91,1.15)	0.89	6437	0.86	1.18 (1.10,1.26)	1.4e-05	16984	Diabetic kidney disease
13	69575210	chr13:69575210:D	0.62	1.16 (1.11,1.22)	4.7e-07	10553	0.6	0.98 (0.92,1.05)	0.61	7867	0.61	1.08 (1.03,1.12)	0.0005	18420	DKD
13	91348016	chr13:91348016:I	0.99	2.58 (2.26,2.93)	5.5e-07	6214	0.98	0.97 (0.64,1.48)	0.82	3939	0.99	1.79 (1.54,2.09)	0.00016	10153	DKD
17	26835775	rs9303616	0.6	1.16 (1.11,1.22)	9.3e-07	10553	0.6	1.02 (0.96,1.09)	0.28	10255	0.6	1.10 (1.05,1.14)	2.2e-05	20808	DKD
20	4762869	rs2422975	0.31	1.17 (1.11,1.23)	1e-06	10554	0.33	0.96 (0.90,1.02)	0.61	9160	0.32	1.06 (1.02,1.11)	0.0012	19714	DKD
CHR	BP	SNP	Discovery				Replication in European and East Asian populations				Joint analysis				Phenotype
			EAF	OR (95%CI)	P	N	EAF	OR (95%CI)	P	N	EAF	OR (95%CI)	P	N
1	74437601	rs189637027	0.86	1.31 (1.21,1.41)	6.1e-08	10547	0.85	0.98 (0.89,1.07)	0.48	14838	0.86	1.11 (1.04,1.18)	0.0032	25385	DKD
13	69575210	chr13:69575210:D	0.62	1.16 (1.11,1.22)	4.7e-07	10553	0.64	0.98 (0.92,1.05)	0.67	8569	0.62	1.07 (1.03,1.12)	0.00054	19122	DKD
13	91348016	chr13:91348016:I	0.99	2.58 (2.26,2.93)	5.5e-07	6214	0.98	0.97 (0.64,1.48)	0.82	3939	0.99	1.79 (1.54,2.09)	0.00016	10153	DKD
17	26835775	rs9303616	0.6	1.16 (1.11,1.22)	9.3e-07	10553	0.6	1.01 (0.97,1.05)	0.73	19358	0.6	1.06 (1.02,1.09)	0.0014	29911	DKD
20	4762869	rs2422975	0.31	1.17 (1.11,1.23)	1e-06	10554	0.28	0.99 (0.94,1.04)	0.71	18263	0.3	1.05 (1.02,1.09)	0.0078	28817	DKD
CHR	BP	SNP	Discovery				Replication in European populations				Joint analysis				Phenotype
			EAF	OR (95%CI)	P	N	EAF	OR (95%CI)	P	N	EAF	OR (95%CI)	P	N
11	92741956	rs768920	0.05	1.51 (1.18,1.94)	6.3e-07	7201	0.06	1.10 (0.84,1.46)	0.45	2061	0.05	1.39 (1.14,1.69)	2.1e-06	9262	Microalbuminuria
13	110867235	rs1143914	0.52	1.20 (1.13,1.28)	1.5e-07	7574	0.52	0.99 (0.87,1.13)	0.96	2061	0.52	1.15 (1.09,1.22)	2.9e-06	9635	Microalbuminuria
17	39151857	rs7222331	0.11	1.39 (1.17,1.65)	8.3e-07	7568	0.11	1.30 (0.98,1.74)	0.04	2171	0.1	1.37 (1.18,1.59)	1.1e-07	9739	Microalbuminuria
CHR	BP	SNP	Discovery				Replication in European and East Asian populations				Joint analysis				Phenotype
			EAF	OR (95%CI)	P	N	EAF	OR (95%CI)	P	N	EAF	OR (95%CI)	P	N
11	92741956	rs768920	0.05	1.51 (1.18,1.94)	6.3e-07	7201	0.06	1.10 (0.84,1.46)	0.66	2682	0.05	1.39 (1.14,1.69)	4e-06	10113	Microalbuminuria
13	110867235	rs1143914	0.52	1.20 (1.13,1.28)	1.5e-07	7574	0.52	0.99 (0.87,1.13)	0.91	2819	0.52	1.15 (1.09,1.22)	1.5e-05	10486	Microalbuminuria
17	39151857	rs7222331	0.11	1.39 (1.17,1.65)	8.3e-07	7568	0.11	1.30 (0.98,1.74)	0.19	2929	0.1	1.37 (1.18,1.59)	1e-06	10590	Microalbuminuria
CHR	BP	SNP	Discovery				Replication in European populations				Joint analysis				Phenotype
			EAF	OR (95%CI)	P	N	EAF	OR (95%CI)	P	N	EAF	OR (95%CI)	P	N
1	55472365	rs4927186	0.49	1.20 (1.13,1.27)	3.4e-07	8112	0.51	0.99 (0.92,1.06)	0.62	8103	0.5	1.09 (1.04,1.14)	0.0011	16215	Late DKD
11	88472034	rs11021131	0.73	1.23 (1.16,1.32)	5.1e-07	7091	0.68	0.96 (0.89,1.03)	0.36	7215	0.7	1.07 (1.02,1.13)	0.0039	14306	Late DKD
11	88506594	rs11021284	0.73	1.24 (1.16,1.32)	5e-07	7088	0.68	0.96 (0.89,1.04)	0.45	7215	0.71	1.08 (1.02,1.13)	0.0026	14303	Late DKD
17	1933008	rs183808765	0.02	2.65 (1.13,6.18)	8.2e-08	5040	0.01	1.03 (0.76,1.41)	0.88	6142	0.01	1.59 (1.10,2.30)	0.0002	11182	Late DKD
CHR	BP	SNP	Discovery				Replication in European and East Asian populations				Joint analysis				Phenotype
			EAF	OR (95%CI)	P	N	EAF	OR (95%CI)	P	N	EAF	OR (95%CI)	P	N
1	55472365	rs4927186	0.49	1.20 (1.13,1.27)	3.4e-07	8112	0.56	0.99 (0.95,1.04)	0.73	18332	0.54	1.05 (1.02,1.09)	0.011	26444	Late DKD
11	88472034	rs11021131	0.73	1.23 (1.16,1.32)	5.1e-07	7091	0.7	0.94 (0.87,1.01)	0.067	8840	0.7	1.05 (1.00,1.10)	0.047	15931	Late DKD
11	88506594	rs11021284	0.73	1.24 (1.16,1.32)	5e-07	7088	0.7	0.95 (0.88,1.02)	0.13	8840	0.71	1.06 (1.01,1.11)	0.026	15928	Late DKD
17	1933008	rs183808765	0.02	2.65 (1.13,6.18)	8.2e-08	5040	0.01	1.03 (0.76,1.41)	0.88	6142	0.01	1.59 (1.10,2.30)	0.0002	11182	Late DKD
CHR	BP	SNP	Discovery				Replication in European populations				Joint analysis				Phenotype
			EAF	OR (95%CI)	P	N	EAF	OR (95%CI)	P	N	EAF	OR (95%CI)	P	N
2	100394020	rs13419977	0.06	1.86 (1.27,2.71)	5.6e-07	4941	0.05	0.95 (0.77,1.18)	0.46	6753	0.05	1.33 (1.09,1.62)	0.0071	11694	End,stage renal disease vs non ESRD
3	121057455	rs2331712	0.12	1.44 (1.19,1.73)	1.9e-08	9337	0.11	0.98 (0.85,1.14)	0.64	6753	0.12	1.22 (1.08,1.37)	6.9e-05	16090	ESRD vs no ESRD
3	121209925	rs61796946	0.11	1.39 (1.16,1.67)	5.6e-07	9335	0.11	0.99 (0.86,1.15)	0.75	6753	0.11	1.20 (1.07,1.36)	0.00031	16088	ESRD vs no ESRD
3	191293190	rs78247479	0.05	1.75 (1.24,2.48)	5.1e-07	5960	0.03	1.10 (0.85,1.42)	0.38	6753	0.04	1.45 (1.15,1.82)	4.5e-05	12713	ESRD vs no ESRD
5	126031144	rs112374688	0.03	6.76 (0.20,229.37)	9.1e-08	2312	0.03	1.10 (0.88,1.39)	0.4	6753	0.03	1.41 (1.01,1.96)	0.00062	9065	ESRD vs no ESRD
8	12681367	rs17830872	0.16	1.40 (1.18,1.66)	8.3e-07	9334	0.16	0.95 (0.84,1.08)	0.33	6753	0.16	1.15 (1.04,1.27)	0.0018	16087	ESRD vs no ESRD
12	131538630	rs35710730	0.06	1.74 (1.25,2.42)	6.7e-07	6811	0.07	0.90 (0.77,1.04)	0.34	6753	0.07	1.20 (1.02,1.40)	0.0045	13564	ESRD vs no ESRD
20	52745723	rs117989384	0.02	3.07 (1.06,8.89)	3e-07	4942	0.02	1.14 (0.75,1.72)	0.56	2398	0.02	2.26 (1.15,4.42)	5.7e-06	7340	ESRD vs no ESRD
CHR	BP	SNP	Discovery				Replication in European and East Asian populations				Joint analysis				Phenotype
			EAF	OR (95%CI)	P	N	EAF	OR (95%CI)	P	N	EAF	OR (95%CI)	P	N
2	100394020	rs13419977	0.06	1.86 (1.27,2.71)	5.6e-07	4941	0.06	0.95 (0.77,1.17)	0.44	7171	0.05	1.32 (1.08,1.60)	0.0092	12112	ESRD vs no ESRD
3	121057455	rs2331712	0.12	1.44 (1.19,1.73)	1.9e-08	9337	0.11	0.98 (0.85,1.14)	0.64	6753	0.12	1.22 (1.08,1.37)	6.9e-05	16090	ESRD vs no ESRD
3	121209925	rs61796946	0.11	1.39 (1.16,1.67)	5.6e-07	9335	0.11	1.01 (0.87,1.17)	0.95	7171	0.11	1.21 (1.07,1.37)	0.00014	16506	ESRD vs no ESRD
3	191293190	rs78247479	0.05	1.75 (1.24,2.48)	5.1e-07	5960	0.09	1.06 (0.84,1.34)	0.45	7171	0.05	1.41 (1.13,1.74)	7.9e-05	13131	ESRD vs no ESRD
5	126031144	rs112374688	0.03	6.76 (0.20,229.37)	9.1e-08	2312	0.03	1.10 (0.88,1.39)	0.4	6753	0.03	1.41 (1.01,1.96)	0.00062	9065	ESRD vs no ESRD
8	12681367	rs17830872	0.16	1.40 (1.18,1.66)	8.3e-07	9334	0.16	0.95 (0.84,1.07)	0.25	7171	0.16	1.15 (1.04,1.26)	0.0032	16505	ESRD vs no ESRD
12	131538630	rs35710730	0.06	1.74 (1.25,2.42)	6.7e-07	6811	0.07	0.90 (0.77,1.04)	0.34	6753	0.07	1.20 (1.02,1.40)	0.0045	13564	ESRD vs no ESRD
20	52745723	rs117989384	0.02	3.07 (1.06,8.89)	3e-07	4942	0.02	1.14 (0.75,1.72)	0.56	2398	0.02	2.26 (1.15,4.42)	5.7e-06	7340	ESRD vs no ESRD
CHR	BP	SNP	Discovery				Replication in European populations				Joint analysis				Phenotype
			EAF	OR (95%CI)	P	N	EAF	OR (95%CI)	P	N	EAF	OR (95%CI)	P	N
14	81617996	rs11622435	0.06	1.59 (1.20,2.10)	9e-07	5143	0.06	1.32 (1.00,1.75)	0.018	4862	0.05	1.48 (1.20,1.81)	2.3e-07	10005	Chronic kidney disease
CHR	BP	SNP	Discovery				Replication in European populations				Joint analysis				Phenotype
			EAF	OR (95%CI)	P	N	EAF	OR (95%CI)	P	N	EAF	OR (95%CI)	P	N
6	32525987	chr6:32525987:I	0.46	1.23 (1.12,1.37)	1.2e-07	8512	0.51	1.05 (0.94,1.16)	0.53	5174	0.48	1.17 (1.08,1.26)	5.2e-06	13686	Chronic kidney disease and diabetic kidney disease
CHR	BP	SNP	Discovery				Replication in European populations				Joint analysis				Phenotype
			EAF	BETA (95%CI)	P	N	EAF	BETA (95%CI)	P	N	EAF	BETA (95%CI)	P	N
6	31024808	rs9262632	0.06	3.39 (1.52,5.26)	0.00038	8948	0.05	1.48 (-0.89,3.85)	0.46	7324	0.06	2.66 (1.19,4.12)	0.00039	16272	Estimated glomerular filtration rate
7	151415041	rs10224002	0.74	1.75 (0.85,2.66)	0.00015	13153	0.77	2.15 ( 0.93,3.37)	0.00058	7342	0.74	1.89 (1.17,2.62)	3.4e-07	20495	eGFR
16	20350459	rs71384446	0.24	2.32 (1.38,3.25)	1.2e-06	13158	0.33	2.25 ( 1.08,3.41)	0.00017	3656	0.26	2.29 (1.56,3.02)	7.9e-10	16814	eGFR
16	20364588	rs4293393	0.2	2.14 (1.17,3.10)	1.3e-05	13157	0.26	2.71 ( 1.53,3.89)	0.0039	7329	0.21	2.37 (1.62,3.11)	5.2e-10	20486	eGFR
16	20365654	rs13333226	0.2	2.18 (1.21,3.14)	9.4e-06	13153	0.26	2.75 ( 1.57,3.93)	0.0028	7339	0.21	2.41 (1.66,3.15)	2.7e-10	20492	eGFR
16	20367690	rs12917707	0.2	2.22 (1.25,3.20)	8.2e-06	13158	0.21	1.60 ( 0.65,2.55)	0.11	10745	0.21	1.90 (1.22,2.58)	4.5e-08	23903	eGFR
16	20400839	rs11864909	0.29	1.90 (1.05,2.74)	1.1e-05	13158	0.34	2.22 ( 1.16,3.28)	4.1e-05	3146	0.3	2.02 (1.36,2.69)	2.1e-09	16304	eGFR
CHR	BP	SNP	Discovery				Replication in European and East Asian populations				Joint analysis				Phenotype
			EAF	BETA (95%CI)	P	N	EAF	BETA (95%CI)	P	N	EAF	BETA (95%CI)	P	N
2	138299909	rs77559408	0.96	5.46 (3.43,7.49)	1.3e-07	13158	0.98	0.96 (-4.54,6.45)	0.73	1670	0.96	4.92 (3.01,6.82)	4.2e-07	14828	eGFR
2	170646916	rs1974990	0.08	4.07 (2.61,5.52)	4.8e-08	13158	0.06	0.04 (-2.69,2.76)	0.98	1670	0.07	3.17 (1.88,4.45)	1.4e-06	14828	eGFR
6	31024808	rs9262632	0.06	3.39 (1.52,5.26)	0.00038	8948	0.06	1.81 ( 0.08,3.53)	0.04	8994	0.06	2.53 (1.27,3.80)	9e-05	17942	eGFR
6	73752358	rs9360630	0.93	3.76 (2.27,5.25)	7.3e-07	13152	0.67	-0.34 (-1.67-0.98)	0.61	1670	0.9	1.48 (0.49,2.47)	0.0035	14822	eGFR
7	151415041	rs10224002	0.74	1.75 (0.85,2.66)	0.00015	13153	0.83	2.42 ( 1.28,3.56)	3.2e-05	9012	0.76	2.01 (1.30,2.72)	2.7e-08	22165	eGFR
8	136109763	rs28766334	0.95	5.31 (3.27,7.34)	3.3e-07	13158	0.61	-0.13 (-1.50-1.24)	0.85	1670	0.91	1.56 (0.42,2.70)	0.0071	14828	eGFR
10	117189374	rs865162	0.24	2.47 (1.50,3.44)	6e-07	13158	0.17	0.65 (-1.19,2.49)	0.49	1670	0.24	2.07 (1.22,2.93)	2.2e-06	14828	eGFR
11	32505205	rs11031812	0.34	2.12 (1.29,2.94)	4.9e-07	13158	0.7	-1.01 (-2.47,0.45)	0.17	1670	0.38	1.36 (0.64,2.08)	0.00021	14828	eGFR
16	20350459	rs71384446	0.24	2.32 (1.38,3.25)	1.2e-06	13158	0.12	2.24 ( 1.13,3.34)	7.4e-05	11041	0.19	2.29 (1.57,3.00)	3.6e-10	24199	eGFR
16	20364588	rs4293393	0.2	2.14 (1.17,3.10)	1.3e-05	13157	0.2	2.54 ( 1.49,3.60)	2.5e-06	8998	0.2	2.32 (1.61,3.03)	1.7e-10	22155	eGFR
16	20365654	rs13333226	0.2	2.18 (1.21,3.14)	9.4e-06	13153	0.2	2.57 ( 1.52,3.63)	1.8e-06	9009	0.2	2.36 (1.65,3.07)	8.8e-11	22162	eGFR
16	20367690	rs12917707	0.2	2.22 (1.25,3.20)	8.2e-06	13158	0.17	1.66 ( 0.72,2.60)	0.00053	12415	0.19	1.93 (1.25,2.61)	2.3e-08	25573	eGFR
16	20400839	rs11864909	0.29	1.90 (1.05,2.74)	1.1e-05	13158	0.18	2.30 ( 1.48,3.12)	3.6e-08	10550	0.24	2.11 (1.52,2.70)	2.3e-12	23708	eGFR
17	74098875	rs2666013	0.25	2.48 (1.50,3.47)	7e-07	13158	0.42	-0.92 (-2.39,0.56)	0.22	1670	0.27	1.44 (0.62,2.26)	0.00056	14828	eGFR
